# Supplementary material for: Metal-free visible-light-mediated aerobic nitrooxylation for the synthesis of nitrate esters with t-BuONO
Source: Royal Society of Chemistry journal article supplement (doi:10.1039/d4cc03272a), 2024-01-01

## Visible-light-mediated aerobic nitrooxylation for the synthesis of nitrate esters with *t*-BuONO

Yufen Lv<sup>\*a</sup>, Jindong Hao<sup>a</sup>, Jian Huang<sup>a</sup>, Lianhui Song<sup>a</sup>, Huilan Yue,<sup>b</sup> Wei Wei<sup>\*a</sup>, Dong Yi<sup>\*c</sup>

<sup>a</sup> School of Chemistry and Chemical Engineering, Qufu Normal University, Qufu 273165, Shandong, P. R. China. E-mail: yufenlv06@163.com; weiweiqfnu@163.com

<sup>b</sup> Qinghai Provincial Key Laboratory of Tibetan Medicine Research and CAS Key Laboratory of Tibetan Medicine Research, Northwest Institute of Plateau Biology, Qinghai 810008, China.

<sup>c</sup> Green Pharmaceutical Technology Key Laboratory of Luzhou City, School of Pharmacy, Southwest Medical University, Luzhou 646000, Sichuan, P. R. China. E-mail: yidong@swmu.edu.cn

### Contents

|                                                                    |         |
|--------------------------------------------------------------------|---------|
| 1. General information .....                                       | S2      |
| 2. General procedure for synthesis of organic nitrate esters ..... | S2      |
| 3. Preliminary mechanistic studies .....                           | S3-S5   |
| 4. Synthetic transformations of product.....                       | S6      |
| 5. Characterization data of products .....                         | S7-S14  |
| 6. Copies of NMR spectra for products.....                         | S15-S44 |

## 1. General information

All commercially available reagent grade chemicals were purchased from Macklin, MCMEC, Bidepharm and Energy Chemical Company and used as received without further purification unless otherwise stated. The solvents were used as analytical reagent grade.  $^1\text{H}$  NMR and  $^{13}\text{C}$  NMR were recorded in  $\text{CDCl}_3$  on a Bruker Avance III spectrometer with TMS as internal standard (400 MHz  $^1\text{H}$ , 101 MHz  $^{13}\text{C}$  or 500 MHz  $^1\text{H}$ , 126 MHz  $^{13}\text{C}$ ) at room temperature, the chemical shifts ( $\delta$ ) were expressed in ppm and J values were given in Hz. The following abbreviations are used to indicate the multiplicity: singlet (s), doublet (d), triplet (t), quartet (q), doublet of doublets (dd), doublet of triplets (dt), and multiplet (m). All first order splitting patterns were assigned on the basis of the appearance of the multiplet. Splitting patterns that could not be easily interpreted were designated as multiplet (m). Mass analyses and HRMS were obtained on a Finnigan-LCQDECA mass spectrometer and a Bruker Daltonics Bio-TOF-Q mass spectrometer by the ESI method, respectively. Column chromatography was performed on silica gel (200-300 mesh).

## 2. General procedure for synthesis of organic nitrate esters

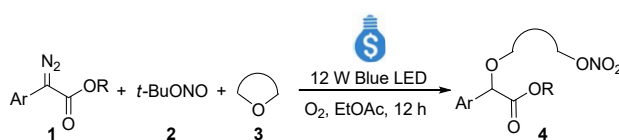

To a mixture of  $\alpha$ -diazo ester **1** (0.2 mmol, 1.0 equiv), *t*-BuONO **2** (0.4 mmol, 47.5  $\mu\text{L}$ ), and cyclic ether **3** (Analytical Reagent, 1.5 mL) was added ethyl acetate (Analytical Reagent, 0.5 mL). The reaction mixture was open to molecular oxygen (balloon) and stirred under the irradiation of 12 W blue LEDs at room temperature for 12 h. After completion of the reaction, the reaction mixture was concentrated to remove

solvent. The residue was purified by column chromatography (eluent: petroleum ether and ethyl acetate) to afford the product **4**.

### 3. Preliminary mechanistic studies

#### 3.1 The model reaction was conducted under N<sub>2</sub>.

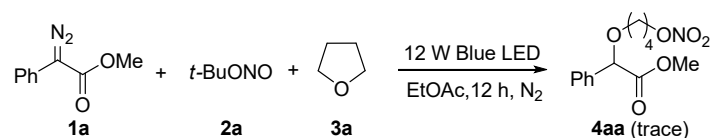

To a mixture of methyl phenyldiazoacetate **1a** (0.2 mmol, 35.2 mg), *t*-BuONO **2a** (0.4 mmol, 48  $\mu$ L), and THF **2a** (Analytical Reagent, 1.5 mL) was added ethyl acetate (AR, 0.5 mL). The reaction mixture was stirred under N<sub>2</sub> with the irradiation of 12 W blue LEDs at room temperature for 12 h. After completion of the reaction, the reaction mixture was concentrated to remove solvent. None of desired product **4aa** was detected.

#### 3.2 The model reaction was conducted in anhydrous solvent.

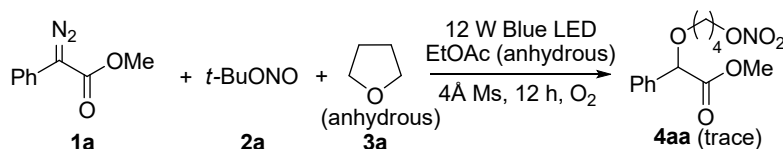

To a mixture of methyl phenyldiazoacetate **1a** (0.2 mmol, 35.2 mg), *t*-BuONO **2a** (0.4 mmol, 48  $\mu$ L), 4 ÅMS (50 mg) and anhydrous THF **2a** (1.5 mL) was added anhydrous ethyl acetate (0.5 mL). The reaction mixture was stirred under molecular oxygen (balloon) with the irradiation of 12 W blue LEDs at room temperature for 12 h. After completion of the reaction, the reaction mixture was concentrated to remove solvent. The desired product **4aa** was not detected.

#### 3.3 The model reaction was conducted in the presence of D<sub>2</sub>O.

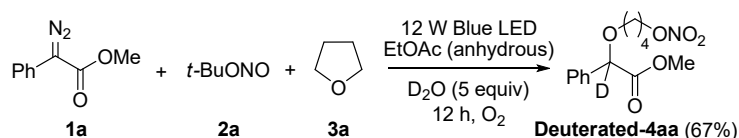

To a mixture of methyl phenyldiazoacetate (0.2 mmol, 35.2 mg), *t*-BuONO **2a** (0.4 mmol, 48  $\mu$ L), D<sub>2</sub>O (1 mmol, 20  $\mu$ L) and anhydrous THF **3a** (1.5 mL) was added

anhydrous ethyl acetate (0.5 mL). The reaction mixture was stirred under molecular oxygen (balloon) with the irradiation of 12 W blue LEDs at room temperature for 12 h. After completion of the reaction, the solution was concentrated to remove solvent, the product **D-4aa** was obtained in 67% yield (38 mg). The product **D-4aa** was determined by  $^1\text{H}$  NMR.

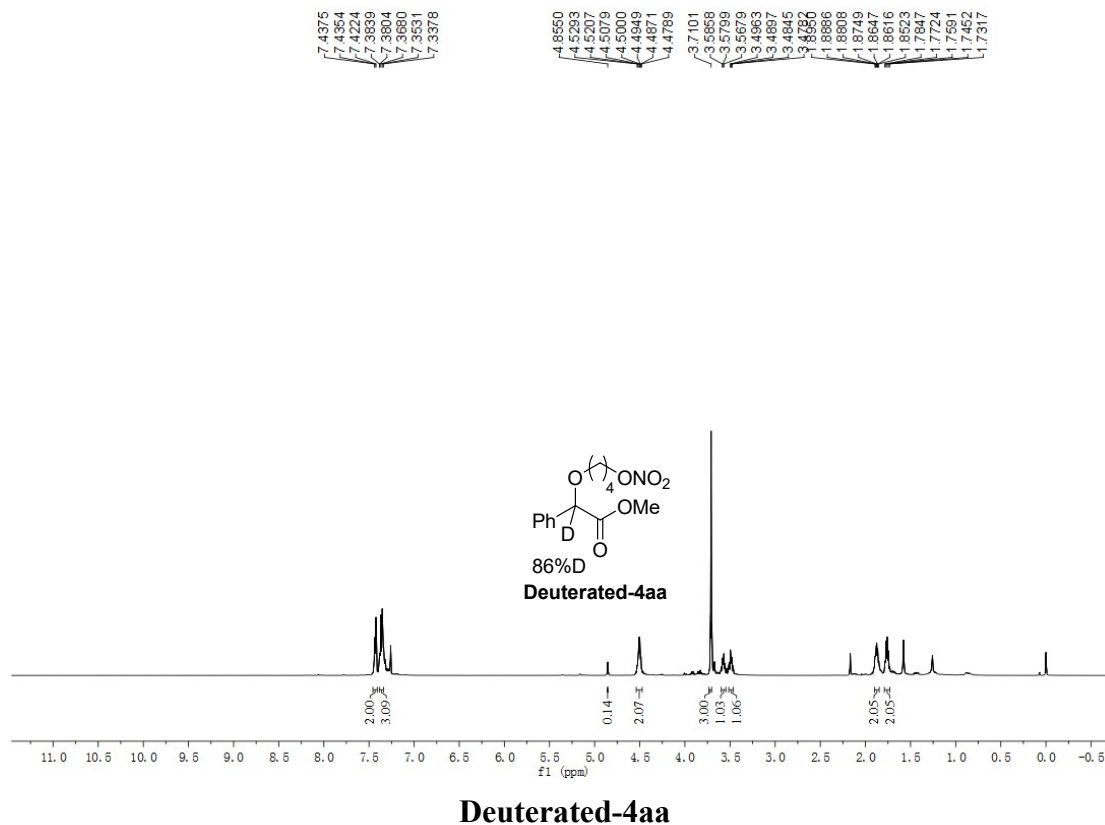

### 3.4 The model reaction was conducted in the presence of $\text{H}_2^{18}\text{O}$ under $\text{O}_2$ .

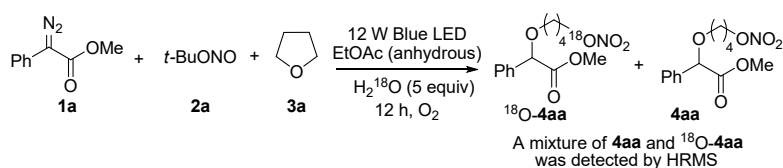

To a mixture of methyl phenyldiazoacetate **1a** (0.2 mmol, 35.2 mg), *t*-BuONO **2a** (0.4 mmol, 48  $\mu\text{L}$ ),  $\text{H}_2^{18}\text{O}$  (1 mmol, 20  $\mu\text{L}$ ) and anhydrous THF **3a** (1.5 mL) was added anhydrous ethyl acetate (0.5 mL). The reaction mixture was stirred under molecular oxygen (balloon) with the irradiation of 12 W blue LEDs at room temperature for 12 h. After completion of the reaction, a mixture of **4aa** and  $^{18}\text{O}$ -**4aa** was detected by HRMS.

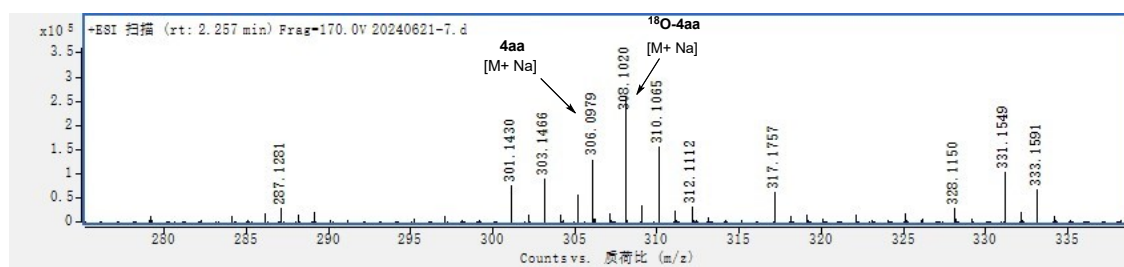

### 3.5 The reaction of $\alpha$ -diazooester (**1a**), THF (**3a**), and $\text{HNO}_3$ .

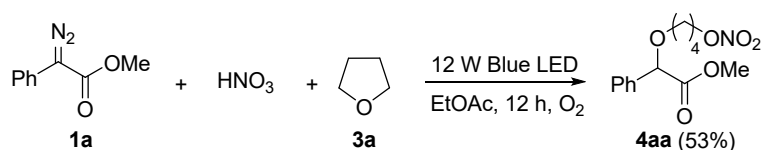

To a mixture of methyl phenyldiazoacetate (0.2 mmol, 35.2 mg),  $\text{HNO}_3$  (0.4 mmol, 28  $\mu\text{L}$ ), and THF **3a** (Analytical Reagent, 1.5 mL) was added ethyl acetate (AR, 0.5 mL). The reaction mixture was stirred under molecular oxygen (balloon) with the irradiation of 12 W blue LEDs at room temperature for 12 h. After completion of the reaction, the reaction mixture was concentrated in vacuum. The residue was purified by column chromatography (eluent: petroleum ether and ethyl acetate 10:1) to afford the product **4aa** in 53% yield (30 mg).

### 3.6 The reaction of $\alpha$ -diazooester (**1a**), THF (**3a**), and $\text{NaNO}_3$ .

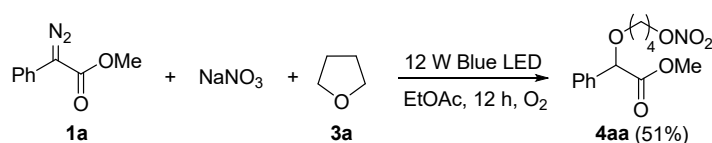

To a mixture of methyl phenyldiazoacetate (0.2 mmol, 35.2 mg),  $\text{NaNO}_3$  (0.4 mmol, 34 mg), and THF **3a** (Analytical Reagent, 1.5 mL) was added ethyl acetate (AR, 0.5 mL). The reaction mixture was stirred under molecular oxygen (balloon) with the irradiation of 12 W blue LEDs at room temperature for 12 h. After completion of the reaction, the reaction mixture was concentrated in vacuum. The residue was purified by column chromatography (eluent: petroleum ether and ethyl acetate 10:1) to afford the product **4aa** in 51% yield (29 mg).

#### 4. Synthetic transformations of product.

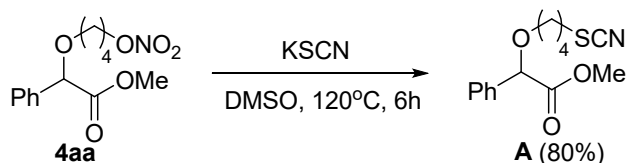

Organic nitrate ester **4aa** (0.1 mmol, 30.5 mg) and KSCN (0.4 mmol, 38.8 mg) were added in a 25 mL reaction tube. Then, DMSO (2 mL) was added to the above mixture. The reaction mixture was stirred at 120°C for 6 h. After completion of the reaction, the reaction mixture was concentrated in vacuum, the desired organic thiocyanate **A** was obtained in 80% yield (22.3 mg).

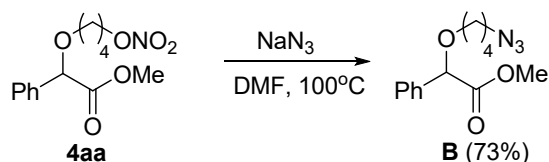

Organic nitrate ester **4aa** (0.1 mmol, 30.5 mg) and NaN<sub>3</sub> (0.3 mmol, 19.5 mg) were added in a 25 mL reaction tube. Then, DMF (2 mL) was added to the above mixture. The reaction mixture was stirred at 100°C for 6 h. After completion of the reaction, the reaction mixture was concentrated in vacuum, the desired organic thiocyanate **B** was obtained in 73% yield (19.2 mg).

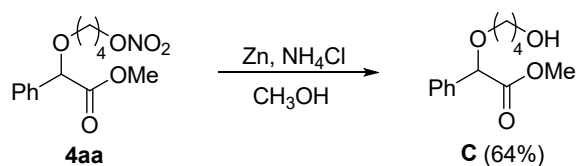

Organic nitrate ester **4aa** (0.1 mmol, 30.5 mg), NH<sub>4</sub>Cl (0.3 mmol, 16 mg) H<sub>2</sub>O (1 mmol, 18ul) and Zn (0.35 mmol, 23 mg) were added in a 25 mL reaction tube. Then, CH<sub>3</sub>OH (2 mL) was added to the above mixture. The reaction mixture was stirred at 80°C for 4 h. After completion of the reaction, the reaction mixture was concentrated in vacuum, the desired compound **C** was obtained in 64% yield (15.2 mg).

#### 4.Characterization data of products

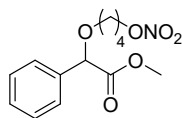

*methyl 2-(4-(nitrooxy)butoxy)-2-phenylacetate (4aa)*. The resultant

residue was purified by flash silica gel column chromatography (eluent: petroleum ether/EtOAc= 10:1, v/v) to afford **4aa** (42.0mg, 74% yield), Yellow oil. <sup>1</sup>H NMR (400 MHz, CDCl<sub>3</sub>): δ 7.42-7.44 (m, 2H), 7.34-7.39 (m, 3H), 4.86 (s, 1H), 4.49-5.53 (m, 2H), 3.71 (s, 3H), 3.55-3.61 (m, 1H), 3.46-3.51 (m, 1H), 1.85-1.90 (m, 2H), 1.74-1.79 (m, 2H); <sup>13</sup>C{<sup>1</sup>H} NMR (101 MHz, CDCl<sub>3</sub>): δ 171.3, 136.4, 128.8, 128.7, 127.1, 81.1, 73.1, 68.9, 52.3, 25.8, 23.9. ESI HRMS: calculated for C<sub>13</sub>H<sub>17</sub>NO<sub>6</sub>Na [M+Na]<sup>+</sup> 306.0956, found 306.0980.

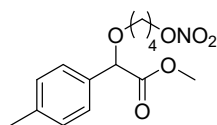

*methyl 2-(4-(nitrooxy)butoxy)-2-(p-tolyl)acetate (4ba)*. The resultant

residue was purified by flash silica gel column chromatography (eluent: petroleum ether/EtOAc= 10:1, v/v) to afford **4ba** (35.8mg, 60% yield), Yellow oil. <sup>1</sup>H NMR (400 MHz, CDCl<sub>3</sub>): δ 7.31 (d, *J* = 8.1 Hz, 2H), 7.18 (d, *J* = 8.0 Hz, 2H), 4.82 (s, 1H), 4.48-4.52 (m, 2H), 3.70 (s, 3H), 3.53-3.60 (m, 1H), 3.44-3.49 (m, 1H), 2.35 (s, 3H), 1.83-1.90 (m, 2H), 1.71-1.78 (m, 2H); <sup>13</sup>C{<sup>1</sup>H} NMR (101 MHz, CDCl<sub>3</sub>): δ 171.4, 138.7, 133.4, 129.4, 127.1, 80.9, 73.1, 68.7, 52.3, 25.8, 23.8, 21.2. ESI HRMS: calculated for C<sub>14</sub>H<sub>19</sub>NO<sub>6</sub>Na [M+Na]<sup>+</sup> 320.1110, found 320.1115.

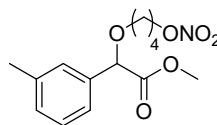

*methyl 2-(4-(nitrooxy)butoxy)-2-(m-tolyl)acetate (4ca)*. The resultant

residue was purified by flash silica gel column chromatography (eluent: petroleum ether/EtOAc= 10:1, v/v) to afford **4ca** (38.0mg, 64% yield), Yellow oil. <sup>1</sup>H NMR (400 MHz, CDCl<sub>3</sub>): δ 7.20-7.26 (m, 3H), 7.15 (d, *J* = 7.2 Hz, 1H), 4.81 (s, 1H), 4.49-4.52 (m, 2H), 3.71 (s, 3H), 3.54-3.59 (m, 1H), 3.46-3.50 (m, 1H), 2.36 (s, 3H), 1.85-1.89 (m, 2H), 1.74-1.78 (m, 2H); <sup>13</sup>C{<sup>1</sup>H} NMR (101 MHz, CDCl<sub>3</sub>): δ 171.4, 138.5, 136.3, 129.6, 128.6, 127.8, 124.3, 81.2, 73.1, 68.8, 52.3, 25.8, 23.8, 21.4. ESI HRMS: calculated for C<sub>14</sub>H<sub>19</sub>NO<sub>6</sub>Na [M+Na]<sup>+</sup> 320.1110, found 320.1168.

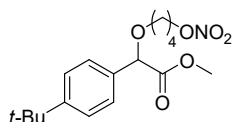

*methyl 2-(4-(tert-butyl)phenyl)-2-(4-(nitrooxy)butoxy)acetate (4da)*.

The resultant residue was purified by flash silica gel column chromatography (eluent: petroleum ether/EtOAc= 10:1, v/v) to afford **4da** (49.0 mg, 72% yield), Yellow oil. <sup>1</sup>H NMR (400 MHz, CDCl<sub>3</sub>): δ 7.38 (d, *J* = 8.4 Hz, 2H), 7.34 (d, *J* = 8.0 Hz, 2H), 4.83 (s, 1H), 4.47-4.53 (m, 2H), 3.71 (s, 3H), 3.54-3.58 (m, 1H), 3.46-3.51 (m, 1H), 1.86-1.89 (m, 2H), 1.74-1.78 (m, 2H), 1.31 (s, 9H); <sup>13</sup>C{<sup>1</sup>H} NMR (101 MHz, CDCl<sub>3</sub>): δ 171.5,

151.8, 133.3, 126.9, 125.7, 80.9, 73.1, 68.8, 52.2, 34.6, 31.3, 31.3, 25.8, 23.8. ESI HRMS: calculated for  $C_{17}H_{25}NO_6Na$   $[M+Na]^+$  362.1580, found 362.1581.

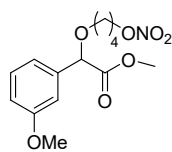

*methyl 2-(3-methoxyphenyl)-2-(4-(nitrooxy)butoxy)acetate (4ea).* The resultant residue was purified by flash silica gel column chromatography (eluent: petroleum ether/EtOAc= 8:1, v/v) to afford **4ea** (45.0mg, 72% yield), Yellow oil.  $^1H$  NMR (400 MHz,  $CDCl_3$ ):  $\delta$  7.26-7.30 (m, 1H), 6.98-7.02 (m, 2H), 6.87-6.89 (m, 1H), 4.83 (s, 1H), 4.49-4.53 (m, 2H), 3.81 (s, 3H), 3.71 (s, 3H), 3.54-3.59 (m, 1H), 3.46-3.52 (m, 1H), 1.84-1.90 (m, 3H), 1.74-1.79 (m, 2H);  $^{13}C\{^1H\}$  NMR (101 MHz,  $CDCl_3$ ):  $\delta$  171.2, 159.8, 137.8, 129.7, 119.5, 114.5, 112.4, 81.0, 73.1, 68.9, 55.3, 52.3, 25.8, 23.9. ESI HRMS: calculated for  $C_{14}H_{19}NO_7Na$   $[M+Na]^+$  336.1059, found 336.1066.

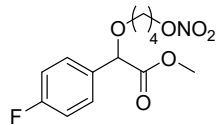

*methyl 2-(4-fluorophenyl)-2-(4-(nitrooxy)butoxy)acetate (4fa).* The resultant residue was purified by flash silica gel column chromatography (eluent: petroleum ether/EtOAc= 9:1, v/v) to afford **4fa** (48.5mg, 81% yield), Yellow oil.  $^1H$  NMR (400 MHz,  $CDCl_3$ ):  $\delta$  7.39-7.43 (m, 2H), 7.03-7.07 (m, 2H), 4.84 (s, 1H), 4.49-4.53 (m, 2H), 3.72 (s, 3H), 3.55-3.61 (m, 1H), 3.45-3.51 (m, 1H), 1.84-1.90 (m, 2H), 1.72-1.79 (m, 2H);  $^{13}C\{^1H\}$  NMR (101 MHz,  $CDCl_3$ ):  $\delta$  171.1, 162.9 (d,  $J$  = 246.2 Hz), 132.2 (d,  $J$  = 3.2 Hz), 128.9 (d,  $J$  = 8.1 Hz), 115.7 (d,  $J$  = 21.6 Hz), 80.4, 73.0, 68.9, 52.4, 25.8, 23.8. ESI HRMS: calculated for  $C_{13}H_{16}FNO_6Na$   $[M+Na]^+$  324.0859, found 324.0862.

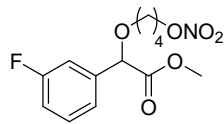

*methyl 2-(3-fluorophenyl)-2-(4-(nitrooxy)butoxy)acetate (4ga).* The resultant residue was purified by flash silica gel column chromatography (eluent: petroleum ether/EtOAc= 9:1, v/v) to afford **4ga** (53.5 mg, 89% yield), Yellow oil.  $^1H$  NMR (400 MHz,  $CDCl_3$ ):  $\delta$  7.31-7.36 (m, 1H), 7.21 (d,  $J$  = 7.7 Hz, 1H), 7.15-7.18 (m, 1H), 7.01-7.06 (m, 1H), 4.86 (s, 1H), 4.49-4.55 (m, 2H), 3.73 (s, 3H), 3.57-3.62 (m, 1H), 3.47-3.53 (m, 1H), 1.86-1.93 (m, 2H), 1.74-1.81 (m, 2H);  $^{13}C\{^1H\}$  NMR (101 MHz,  $CDCl_3$ ):  $\delta$  170.8, 162.9 (d,  $J$  = 244.9 Hz), 138.8 (d,  $J$  = 7.3 Hz), 130.2 (d,  $J$  = 8.1 Hz), 122.7 (d,  $J$  = 3.0 Hz), 115.7 (d,  $J$  = 21.0 Hz), 114.1 (d,  $J$  = 22.4 Hz), 80.4 (d,  $J$  = 1.8 Hz), 73.0, 69.1, 52.4, 25.8, 23.8. ESI HRMS: calculated for  $C_{13}H_{16}FNO_6Na$   $[M+Na]^+$  324.0859, found 324.0860.

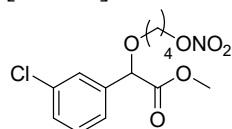

*methyl 2-(3-chlorophenyl)-2-(4-(nitrooxy)butoxy)acetate (4ha).* The resultant residue was purified by flash silica gel column chromatography (eluent: petroleum ether/EtOAc= 10:1, v/v) to afford **4ha** (52.0mg, 82% yield), Yellow oil.  $^1H$  NMR (400 MHz,  $CDCl_3$ ):  $\delta$  7.43-7.44 (m, 1H), 7.30-7.33 (m, 3H), 4.83 (s, 1H), 4.50-4.53 (m, 2H), 3.73 (s, 3H), 3.56-3.62 (m, 1H), 3.47-3.52 (m, 1H), 1.85-1.91 (m, 2H), 1.75-1.80 (m, 2H);  $^{13}C\{^1H\}$  NMR (101 MHz,  $CDCl_3$ ):  $\delta$  170.7, 138.3, 134.6, 130.0, 128.9, 127.2, 125.2, 80.4, 73.0, 69.1, 52.5, 25.8, 23.8. ESI HRMS: calculated for  $C_{13}H_{16}ClNO_6Na$   $[M+Na]^+$  340.0564, found 340.0577.

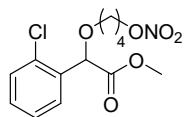

*methyl 2-(2-chlorophenyl)-2-(4-(nitrooxy)butoxy)acetate (4ia).* The

resultant residue was purified by flash silica gel column chromatography (eluent: petroleum ether/EtOAc= 10:1, v/v) to afford **4ia** (47.0mg, 76% yield), Yellow oil. <sup>1</sup>H NMR (400 MHz, CDCl<sub>3</sub>): δ 7.47-7.49 (m, 1H), 7.39-7.41 (m, 1H), 7.28-7.31 (m, 2H), 5.35 (s, 1H), 4.47-4.51 (m, 2H), 3.73 (s, 3H), 3.62-3.68 (m, 1H), 3.49-3.54 (m, 1H), 1.84-1.90 (m, 2H), 1.73-1.78 (m, 2H); <sup>13</sup>C{<sup>1</sup>H} NMR (101 MHz, CDCl<sub>3</sub>): δ 170.7, 134.5, 133.8, 130.0, 129.7, 128.7, 127.3, 77.3, 73.0, 69.3, 52.4, 25.8, 23.8. ESI HRMS: calculated for C<sub>13</sub>H<sub>16</sub>ClNO<sub>6</sub>Na [M+Na]<sup>+</sup> 340.0564, found 340.0578.

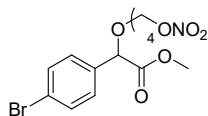

*methyl 2-(4-bromophenyl)-2-(4-(nitrooxy)butoxy)acetate (4ja).* The

resultant residue was purified by flash silica gel column chromatography (eluent: petroleum ether/EtOAc= 10:1, v/v) to afford **4ja** (49.0mg, 68% yield), Yellow oil. <sup>1</sup>H NMR (400 MHz, CDCl<sub>3</sub>): δ 7.49-7.51 (m, 2H), 7.30-7.33 (m, 2H), 4.81 (s, 1H), 4.49-4.53 (m, 2H), 3.71 (s, 3H), 3.56-3.61 (m, 1H), 3.45-3.50 (m, 1H), 1.86-1.90 (m, 2H), 1.74-1.79 (m, 2H); <sup>13</sup>C{<sup>1</sup>H} NMR (101 MHz, CDCl<sub>3</sub>): δ 170.8, 135.4, 131.8, 128.7, 122.9, 80.4, 73.0, 69.1, 52.4, 25.8, 23.8. ESI HRMS: calculated for C<sub>13</sub>H<sub>16</sub>BrNO<sub>6</sub>Na [M+Na]<sup>+</sup> 384.0059, found 384.0043.

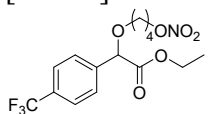

*ethyl 2-(4-(nitrooxy)butoxy)-2-(4-(trifluoromethyl)phenyl)acetate (4ka).* The

resultant residue was purified by flash silica gel column chromatography (eluent: petroleum ether/EtOAc= 8:1, v/v) to afford **4ka** (49.0mg, 67% yield), Yellow oil. <sup>1</sup>H NMR (500MHz, CDCl<sub>3</sub>): δ 7.63 (d, *J* = 8.3 Hz, 2H), 7.58 (d, *J* = 8.2 Hz, 2H), 4.89 (s, 1H), 4.51-4.54 (m, 2H), 4.14-4.22 (m, 2H), 3.61-3.66 (m, 1H), 3.49-3.53 (m, 1H), 1.87-1.91 (m, 2H), 1.77-1.81 (m, 2H), 1.23 (t, *J* = 7.1 Hz, 3H); <sup>13</sup>C{<sup>1</sup>H} NMR (126 MHz, CDCl<sub>3</sub>): 170.2, 140.4, 130.8 (d, *J* = 32.3 Hz), 128.9, 127.3, 125.6 (q, *J* = 3.8 Hz), 123.9 (d, *J* = 272.6 Hz), 80.6, 73.0, 69.2, 61.6, 25.8, 23.9, 14.1. ESI HRMS: calculated for C<sub>15</sub>H<sub>18</sub>F<sub>3</sub>NO<sub>6</sub>Na [M+Na]<sup>+</sup> 388.0984, found 388.1006.

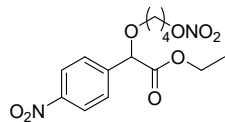

*ethyl 2-(4-(nitrooxy)butoxy)-2-(4-nitrophenyl)acetate (4la).* The

resultant residue was purified by flash silica gel column chromatography (eluent: petroleum ether/EtOAc= 8:1, v/v) to afford **4la** (48.0mg, 70% yield), Yellow oil. <sup>1</sup>H NMR (400 MHz, CDCl<sub>3</sub>): δ 8.23 (d, *J* = 8.8 Hz, 2H), 7.65 (d, *J* = 8.7 Hz, 2H), 4.95 (s, 1H), 4.54 (t, *J* = 6.7 Hz, 2H), 4.16-4.23 (m, 2H), 3.65-3.71 (m, 1H), 3.52-3.57 (m, 1H), 1.88-1.93 (m, 2H), 1.79-1.84 (m, 2H), 1.23 (t, *J* = 7.1 Hz, 3H); <sup>13</sup>C{<sup>1</sup>H} NMR (101 MHz, CDCl<sub>3</sub>): δ 169.7, 148.0, 143.5, 127.8, 123.8, 80.2, 73.0, 69.5, 61.8, 25.8, 23.9, 14.1. ESI HRMS: calculated for C<sub>14</sub>H<sub>18</sub>N<sub>2</sub>O<sub>8</sub>Na [M+Na]<sup>+</sup> 365.0961, found 365.0982.

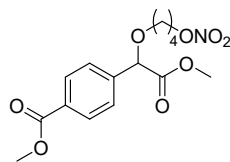

*methyl 4-(2-methoxy-1-(4-(nitrooxy)butoxy)-2-oxoethyl)benzoate*

(**4ma**). The resultant residue was purified by flash silica gel column chromatography (eluent: petroleum ether/EtOAc= 8:1, v/v) to afford **4ma** (56.5mg, 83% yield), Yellow oil.  $^1\text{H}$  NMR (400 MHz,  $\text{CDCl}_3$ ):  $\delta$  8.03 (d,  $J$  = 8.4 Hz, 2H), 7.52 (d,  $J$  = 8.2 Hz, 2H), 4.91 (s, 1H), 4.50-4.53 (m, 2H), 3.92 (s, 3H), 3.72 (s, 3H), 3.60-3.64 (m, 1H), 3.48-3.52 (m, 1H), 1.86-1.91 (m, 2H), 1.75-1.81 (m, 2H);  $^{13}\text{C}$  { $^1\text{H}$ } NMR (101 MHz,  $\text{CDCl}_3$ ):  $\delta$  170.7, 166.7, 141.2, 130.5, 129.9, 127.0, 80.7, 73.0, 69.2, 52.5, 52.2, 25.8, 23.8. ESI HRMS: calculated for  $\text{C}_{15}\text{H}_{19}\text{NO}_8\text{Na}$  [ $\text{M}+\text{Na}$ ] $^+$  364.1008, found 364.1009.

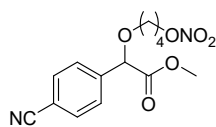

*methyl 2-(4-cyanophenyl)-2-(4-(nitrooxy)butoxy)acetate (**4na**)*

The resultant residue was purified by flash silica gel column chromatography (eluent: petroleum ether/EtOAc= 8:1, v/v) to afford **4na** (33.2 mg, 54% yield), Yellow oil.  $^1\text{H}$  NMR (400MHz,  $\text{CDCl}_3$ ):  $\delta$  7.67 (d,  $J$  = 8.2 Hz, 2H), 7.57 (d,  $J$  = 8.2 Hz, 2H), 4.91 (s, 1H), 4.53 (t,  $J$  = 6.5 Hz, 2H), 3.73 (s, 3H), 3.62-3.65 (m, 1H), 3.49-3.54 (m, 1H), 1.86-1.92 (m, 2H), 1.77-1.82 (m, 2H);  $^{13}\text{C}$  NMR (101 MHz,  $\text{CDCl}_3$ ):  $\delta$  170.3, 141.5, 132.5, 127.6, 118.5, 112.6, 80.4, 72.9, 69.5, 52.7, 25.8, 23.8. ESI HRMS: calculated for  $\text{C}_{14}\text{H}_{16}\text{N}_2\text{O}_6\text{Na}$  [ $\text{M}+\text{Na}$ ] $^+$  331.0906, found 331.0914.

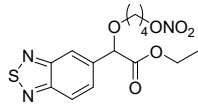

*ethyl 2-(benzo[*c*][1,2,5]thiadiazol-5-yl)-2-(4-(nitrooxy)butoxy)acetate*

(**4oa**). The resultant residue was purified by flash silica gel column chromatography (eluent: petroleum ether/EtOAc= 8:1, v/v) to afford **4oa** (52.0 mg, 74% yield), Yellow oil.  $^1\text{H}$  NMR (500 MHz,  $\text{CDCl}_3$ ):  $\delta$  8.08 (s, 1H), 8.01 (d,  $J$  = 9.1 Hz, 1H), 7.70-1.72 (m, 1H), 5.02 (s, 1H), 4.52-4.55 (m, 2H), 4.16-4.25 (m, 2H), 3.66-3.71 (m, 1H), 3.55-3.59 (m, 1H), 1.89-1.94 (m, 2H), 1.80-1.84 (m, 2H), 1.23 (t,  $J$  = 7.1 Hz, 3H);  $^{13}\text{C}$  { $^1\text{H}$ } NMR (126 MHz,  $\text{CDCl}_3$ ):  $\delta$  170.0, 154.8, 154.6, 138.3, 128.2, 121.8, 119.9, 80.8, 73.0, 69.3, 61.7, 25.9, 23.9, 14.1. ESI HRMS: calculated for  $\text{C}_{14}\text{H}_{17}\text{N}_3\text{O}_6\text{SNa}$  [ $\text{M}+\text{Na}$ ] $^+$  378.0736, found 378.0773.

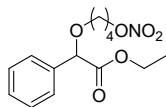

*ethyl 2-(4-(nitrooxy)butoxy)-2-phenylacetate (**4pa**)*

The resultant residue was purified by flash silica gel column chromatography (eluent: petroleum ether/EtOAc= 10:1, v/v) to afford **4pa** (39.5mg, 66% yield), Yellow oil.  $^1\text{H}$  NMR (400 MHz,  $\text{CDCl}_3$ ):  $\delta$  7.42-7.45 (m, 2H), 7.33-7.38 (m, 3H), 4.84 (s, 1H), 4.49-4.53 (m, 2H), 4.12-4.22 (m, 2H), 3.56-3.61 (m, 1H), 3.47-3.52 (m, 1H), 1.85-1.90 (m, 2H), 1.73-1.79 (m, 2H), 1.21 (t,  $J$  = 7.1 Hz, 3H);  $^{13}\text{C}$  { $^1\text{H}$ } NMR (101 MHz,  $\text{CDCl}_3$ ):  $\delta$  170.8, 136.5, 128.7, 128.6, 127.1, 81.2, 73.1, 68.8, 61.3, 25.8, 23.9, 14.1. ESI HRMS: calculated for  $\text{C}_{14}\text{H}_{19}\text{NO}_6\text{Na}$  [ $\text{M}+\text{Na}$ ] $^+$  320.1110, found 320.1123.

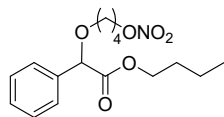

*butyl 2-(4-(nitrooxy)butoxy)-2-phenylacetate (4qa).* The resultant

residue was purified by flash silica gel column chromatography (eluent: petroleum ether/EtOAc= 10:1, v/v) to afford **4qa** (34.0mg, 52% yield), Yellow oil.  $^1\text{H}$  NMR (400 MHz,  $\text{CDCl}_3$ ):  $\delta$  7.42-7.44 (m, 2H), 7.33-7.38 (m, 3H), 4.84 (s, 1H), 4.49- 4.53 (m, 2H), 4.09-4.13 (m, 2H), 3.56-3.62 (m, 1H), 3.47-3.52 (m, 1H), 1.85-1.91 (m, 2H), 1.73-1.79 (m, 2H), 1.54-1.57 (m, 2H), 1.23-1.31 (m, 2H), 0.87 (t,  $J$  = 7.4 Hz, 3H);  $^{13}\text{C}$  {1H} NMR (101 MHz,  $\text{CDCl}_3$ ):  $\delta$  170.9, 136.6, 128.7, 128.6, 127.1, 81.2, 73.1, 68.8, 65.1, 30.5, 25.8, 23.9, 18.9, 13.6. ESI HRMS: calculated for  $\text{C}_{16}\text{H}_{23}\text{NO}_6\text{Na}$   $[\text{M}+\text{Na}]^+$  348.1423, found 348.1434.

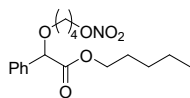

*pentyl 2-(4-(nitrooxy)butoxy)-2-phenylacetate (4ra).* The resultant

residue was purified by flash silica gel column chromatography (eluent: petroleum ether/EtOAc= 10:1, v/v) to afford **4ra** (33.0mg, 49% yield), Yellow oil.  $^1\text{H}$  NMR (400 MHz,  $\text{CDCl}_3$ ):  $\delta$  7.42-7.45 (m, 2H), 7.33-7.38 (m, 3H), 4.84 (s, 1H), 4.49- 4.53 (m, 2H), 4.10 (t,  $J$  = 6.7 Hz, 2H), 3.56-3.62 (m, 1H), 3.48-3.52 (m, 1H), 1.85-1.92 (m, 2H), 1.73-1.80 (m, 2H), 1.55-1.60 (m, 2H), 1.19-1.24 (m, 4H), 0.84 (t,  $J$  = 7.1 Hz, 3H);  $^{13}\text{C}$  {1H} NMR (101 MHz,  $\text{CDCl}_3$ ):  $\delta$  170.9, 136.6, 128.7, 128.6, 127.1, 81.2, 73.1, 68.8, 65.3, 28.2, 27.8, 25.8, 23.9, 22.2, 13.9. ESI HRMS: calculated for  $\text{C}_{17}\text{H}_{25}\text{NO}_6\text{Na}$   $[\text{M}+\text{Na}]^+$  362.1580, found 362.1612.

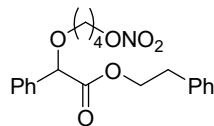

*phenethyl 2-(4-(nitrooxy)butoxy)-2-phenylacetate (4sa).* The resultant

residue was purified by flash silica gel column chromatography (eluent: petroleum ether/EtOAc= 9:1, v/v) to afford **4sa** (54.0mg, 72% yield), Yellow oil.  $^1\text{H}$  NMR (400 MHz,  $\text{CDCl}_3$ ):  $\delta$  7.37-7.38 (m, 2H), 7.33-7.35 (m, 3H), 7.21-7.25 (m, 3H), 7.07-7.09 (m, 2H), 4.80 (s, 1H), 4.46-4.50 (m, 2H), 4.31-4.35 (m, 2H), 3.48-3.53 (m, 1H), 3.41-3.46 (m, 1H), 2.85-2.89 (m, 2H), 1.81-1.88 (m, 2H), 1.70-1.75 (m, 2H);  $^{13}\text{C}$  {1H} NMR (101 MHz,  $\text{CDCl}_3$ ):  $\delta$  170.8, 137.5, 136.4, 128.9, 128.7, 128.7, 128.5, 127.1, 126.6, 81.1, 73.1, 68.8, 65.6, 34.9, 25.8, 23.9. ESI HRMS: calculated for  $\text{C}_{20}\text{H}_{23}\text{NO}_6\text{Na}$   $[\text{M}+\text{Na}]^+$  396.1423, found 396.1424.

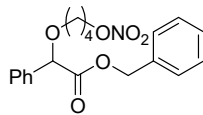

*benzyl 2-(4-(nitrooxy)butoxy)-2-phenylacetate (4ta).* The resultant

residue was purified by flash silica gel column chromatography (eluent: petroleum ether/EtOAc= 9:1, v/v) to afford **4ta** (38.0mg, 53% yield), Yellow oil.  $^1\text{H}$  NMR (400 MHz,  $\text{CDCl}_3$ ):  $\delta$  7.42-7.43 (m, 2H), 7.34-7.36 (m, 3H), 7.30-7.31 (m, 3H), 7.21-7.22 (m, 2H), 5.11-5.18 (m, 2H), 4.89 (s, 1H), 4.46-4.49 (m, 2H), 3.55-3.60 (m, 1H), 3.47-3.51 (m, 1H), 1.82-1.87 (m, 2H), 1.73-1.77 (m, 2H);  $^{13}\text{C}$  {1H} NMR (101 MHz,  $\text{CDCl}_3$ ):  $\delta$  170.7, 136.3, 135.4, 128.8, 128.7, 128.5, 128.3, 128.0, 127.2, 81.2, 73.1, 68.9, 66.8,

25.8, 23.9. ESI HRMS: calculated for  $C_{19}H_{21}NO_6Na$   $[M+Na]^+$  382.1267, found 382.1267.

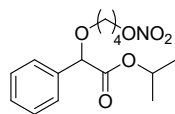

*isopropyl 2-(4-(nitrooxy)butoxy)-2-phenylacetate (4ua)*. The resultant residue was purified by flash silica gel column chromatography (eluent: petroleum ether/EtOAc= 10:1, v/v) to afford **4ua** (36.0mg, 58% yield), Yellow oil.  $^1H$  NMR (400 MHz,  $CDCl_3$ ):  $\delta$  7.42-7.44 (m, 2H), 7.32-7.37 (m, 3H), 5.01-5.06 (m, 1H), 4.80 (s, 1H), 4.49-4.54 (m, 2H), 3.57-3.61 (m, 1H), 3.48-3.52 (m, 1H), 1.86-1.92 (m, 2H), 1.74-1.79 (m, 2H), 1.24 (d,  $J$  = 6.3 Hz, 3H), 1.12 (d,  $J$  = 6.3 Hz, 3H);  $^{13}C$  {1H} NMR (101 MHz,  $CDCl_3$ ):  $\delta$  170.4, 136.6, 128.6, 128.6, 127.0, 81.3, 73.2, 68.8, 68.8, 25.8, 23.9, 21.8, 21.5. ESI HRMS: calculated for  $C_{15}H_{21}NO_6Na$   $[M+Na]^+$  334.1267, found 334.1352.

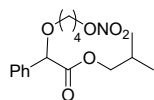

*isobutyl 2-(4-(nitrooxy)butoxy)-2-phenylacetate (4va)*. The resultant residue was purified by flash silica gel column chromatography (eluent: petroleum ether/EtOAc= 10:1, v/v) to afford **4va** (47.0mg, 72% yield), Yellow oil.  $^1H$  NMR (400 MHz,  $CDCl_3$ ):  $\delta$  7.43-7.45 (m, 2H), 7.33-7.38 (m, 3H), 4.85 (s, 1H), 4.49-4.53 (m, 2H), 3.85-3.93 (m, 3H), 3.57-3.62 (m, 1H), 3.47-3.52 (m, 1H), 1.83-1.92 (m, 4H), 1.75-1.80 (m, 2H), 0.83 (d,  $J$  = 1.3 Hz, 3H), 0.81 (d,  $J$  = 1.3 Hz, 3H);  $^{13}C$  {1H} NMR (101 MHz,  $CDCl_3$ ):  $\delta$  170.9, 136.7, 128.7, 128.6, 127.1, 81.2, 73.1, 71.1, 68.8, 27.7, 25.8, 23.9, 18.9. ESI HRMS: calculated for  $C_{16}H_{23}NO_6Na$   $[M+Na]^+$  348.1423, found 348.1437.

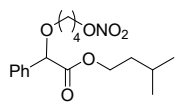

*isopentyl 2-(4-(nitrooxy)butoxy)-2-phenylacetate (4wa)*. The resultant residue was purified by flash silica gel column chromatography (eluent: petroleum ether/EtOAc= 10:1, v/v) to afford **4wa** (53.0mg, 78% yield), Yellow oil.  $^1H$  NMR (400 MHz,  $CDCl_3$ ):  $\delta$  7.42-7.44 (m, 2H), 7.34-7.38 (m, 3H), 4.83 (s, 1H), 4.49-4.53 (m, 2H), 4.09-4.16 (m, 2H), 3.57-3.61 (m, 1H), 3.47-3.51 (m, 1H), 1.86-1.90 (m, 2H), 1.75-1.79 (m, 2H), 1.52-1.57 (m, 1H), 1.45-1.48 (m, 2H), 0.83-0.86 (m, 6H);  $^{13}C$  {1H} NMR (101 MHz,  $CDCl_3$ ):  $\delta$  170.9, 136.6, 128.7, 128.6, 127.1, 81.2, 73.1, 68.8, 63.9, 37.1, 25.8, 25.0, 23.9, 22.4, 22.3. ESI HRMS: calculated for  $C_{17}H_{25}NO_6Na$   $[M+Na]^+$  362.1580, found 362.1598.

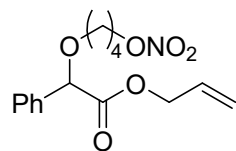

*allyl 2-(4-(nitrooxy)butoxy)-2-phenylacetate (4xa)*. The resultant residue was purified by flash silica gel column chromatography (eluent: petroleum ether/EtOAc= 9:1, v/v) to afford **4xa** (31 mg, 50% yield), Yellow oil.  $^1H$  NMR (400MHz,  $CDCl_3$ ):  $\delta$  7.36-7.38 (m, 2H), 7.26-7.31 (m, 3H), 5.73-5.80 (m, 1H), 5.09-5.14 (m, 2H), 4.80 (s, 1H), 4.53-4.55 (m, 2H), 4.42-4.45 (m, 2H), 3.50-3.55 (m, 1H), 3.40-3.45 (m, 1H), 1.79-1.83 (m, 2H), 1.67-1.71 (m, 2H);  $^{13}C$  NMR (101 MHz,  $CDCl_3$ ):  $\delta$  170.5, 136.4, 131.6, 128.8, 128.6, 127.1, 118.5, 81.2, 73.1, 68.9, 65.6, 25.8, 23.9. ESI HRMS: calculated for  $C_{15}H_{19}NO_6Na$   $[M+Na]^+$  332.1110, found 332.1115.

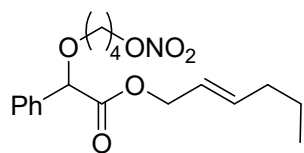

(*E*)-hex-2-enyl 2-(4-(nitrooxy)butoxy)-2-phenylacetate (**4ya**).

The resultant residue was purified by flash silica gel column chromatography (eluent: petroleum ether/EtOAc= 9:1, v/v) to afford **4ya** (30 mg, 43% yield), Yellow oil.  $^1\text{H}$  NMR (400MHz,  $\text{CDCl}_3$ ):  $\delta$  7.35-7.37 (m, 2H), 7.25-7.30 (m, 3H), 5.57-5.63 (m, 1H), 5.38-5.49 (m, 1H), 4.78 (s, 1H), 4.41-4.50 (m, 4H), 3.49-3.54 (m, 1H), 3.40-3.45 (m, 1H), 1.88-1.93 (m, 2H), 1.79-1.83 (m, 2H), 1.67-1.72 (m, 2H), 1.26-1.31 (m, 2H), 0.79 (t,  $J = 7.3$  Hz, 3H);  $^{13}\text{C}$  NMR (101 MHz,  $\text{CDCl}_3$ ):  $\delta$  170.6, 136.9, 136.5, 128.7, 128.6, 127.1, 123.3, 81.2, 73.1, 68.8, 65.8, 34.2, 25.8, 23.9, 21.9, 13.5. ESI HRMS: calculated for  $\text{C}_{18}\text{H}_{25}\text{NO}_6\text{Na}$   $[\text{M}+\text{Na}]^+$  374.1580, found 374.1583.

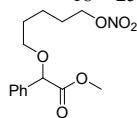

methyl 2-((5-(nitrooxy)pentyl)oxy)-2-phenylacetate (**4ab**). The resultant

residue was purified by flash silica gel column chromatography (eluent: petroleum ether/EtOAc= 10:1, v/v) to afford **4ab** (35.5mg, 60% yield), Yellow oil.  $^1\text{H}$  NMR (500 MHz,  $\text{CDCl}_3$ ):  $\delta$  7.43-7.45 (m, 2H), 7.33-7.39 (m, 3H), 4.86 (s, 1H), 4.44 (t,  $J = 6.6$  Hz, 2H), 3.71 (s, 3H), 3.53-3.57 (m, 1H), 3.42-3.47 (m, 1H), 1.72-1.76 (m, 2H), 1.67-1.71 (m, 2H), 1.50-1.55 (m, 2H);  $^{13}\text{C}$  NMR (126 MHz,  $\text{CDCl}_3$ ):  $\delta$  171.4, 136.5, 128.7, 128.6, 127.1, 81.2, 73.2, 69.4, 52.3, 29.1, 26.5, 22.4. ESI HRMS: calculated for  $\text{C}_{14}\text{H}_{19}\text{NO}_6\text{Na}$   $[\text{M}+\text{Na}]^+$  320.1110, found 320.1138.

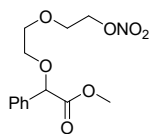

methyl 2-(2-(2-(nitrooxy)ethoxy)ethoxy)-2-phenylacetate (**4ac**). The

resultant residue was purified by flash silica gel column chromatography (eluent: petroleum ether/EtOAc= 6:1, v/v) to afford **4ac** (10.5mg, 18% yield), Yellow oil.  $^1\text{H}$  NMR (400 MHz,  $\text{CDCl}_3$ ):  $\delta$  7.43-7.45 (m, 2H), 7.33-7.39 (m, 3H), 4.97 (s, 1H), 4.61 (t,  $J = 4.6$  Hz, 2H), 3.77-3.83 (m, 2H), 3.70-3.73 (m, 5H), 3.61-3.68 (m, 2H);  $^{13}\text{C}\{^1\text{H}\}$  NMR (101 MHz,  $\text{CDCl}_3$ ):  $\delta$  171.2, 136.3, 128.7, 128.6, 127.3, 81.4, 72.2, 70.8, 69.1, 67.3, 52.2. ESI HRMS: calculated for  $\text{C}_{13}\text{H}_{17}\text{NO}_7\text{Na}$   $[\text{M}+\text{Na}]^+$  322.0903, found 322.0935.

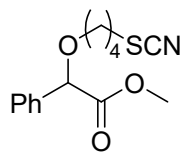

methyl 2-phenyl-2-(4-thiocyanatobutoxy)acetate (**A**), Colorless oil.  $^1\text{H}$

NMR (400 MHz,  $\text{CDCl}_3$ ):  $\delta$  7.34-7.37 (m, 2H), 7.28 - 7.32 (m, 3H), 4.78 (s, 1H), 3.69 (s, 3H), 3.49 - 3.52 (m, 1H), 3.42 - 3.45 (m, 1H), 2.96 (t,  $J = 7.2$  Hz, 2H), 1.89 - 1.93 (m, 2H), 1.72 - 1.77 (m, 2H);  $^{13}\text{C}$  NMR (101 MHz,  $\text{CDCl}_3$ ):  $\delta$  171.3, 136.3, 128.8, 128.7, 127.2, 112.3, 81.2, 68.8, 52.3, 33.8, 27.7, 27.0; ESI HRMS: calculated for  $\text{C}_{14}\text{H}_{17}\text{NO}_3\text{SNa}$   $[\text{M}+\text{Na}]^+$  302.0827, found 302.0823.

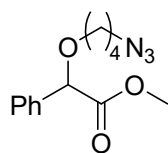

*methyl 2-(4-azidobutoxy)-2-phenylacetate (B)*, Colorless oil.  $^1\text{H}$  NMR (400 MHz,  $\text{CDCl}_3$ )  $\delta$  7.35 – 7.38 (m, 2H), 7.26 – 7.31 (m, 3H), 4.79 (s, 1H), 3.63 (s, 3H), 3.48 – 3.51 (m, 1H), 3.39 – 3.41 (m, 1H), 3.21–3.23 (m, 2H), 1.62 – 1.66 (m, 4H).  $^{13}\text{C}$  NMR (101 MHz,  $\text{CDCl}_3$ )  $\delta$  171.3, 136.5, 128.7, 128.6, 127.2, 81.1, 69.1, 52.2, 51.2, 26.8, 25.7. ESI HRMS: calculated for  $\text{C}_{13}\text{H}_{18}\text{N}_3\text{O}_3$   $[\text{M}+\text{H}]^+$  264.1348, found 264.1343.

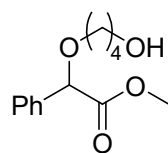

*methyl 2-(4-hydroxybutoxy)-2-phenylacetate (C)*, Colorless oil.  $^1\text{H}$  NMR (400 MHz,  $\text{CDCl}_3$ )  $\delta$  7.35 – 7.38 (m, 2H), 7.26 – 7.31 (m, 3H), 4.80 (s, 1H), 3.64 (s, 3H), 3.60 (t,  $J = 6.2$  Hz, 2H), 3.48 – 3.52 (m, 1H), 3.39 – 3.44 (m, 1H), 1.90 (brs, 1H), 1.60 – 1.69 (m, 4H).  $^{13}\text{C}$  NMR (101 MHz,  $\text{CDCl}_3$ )  $\delta$  171.4, 136.4, 128.7, 128.6, 127.2, 81.2, 69.8, 62.6, 52.3, 29.8, 26.4. ESI HRMS: calculated for  $\text{C}_{13}\text{H}_{19}\text{O}_4$   $[\text{M}+\text{H}]^+$  239.1283, found 239.1277.

## 5.Copies of NMR spectra for products

**4aa**  $^1\text{H}$  NMR (400 MHz,  $\text{CDCl}_3$ )

CH-7

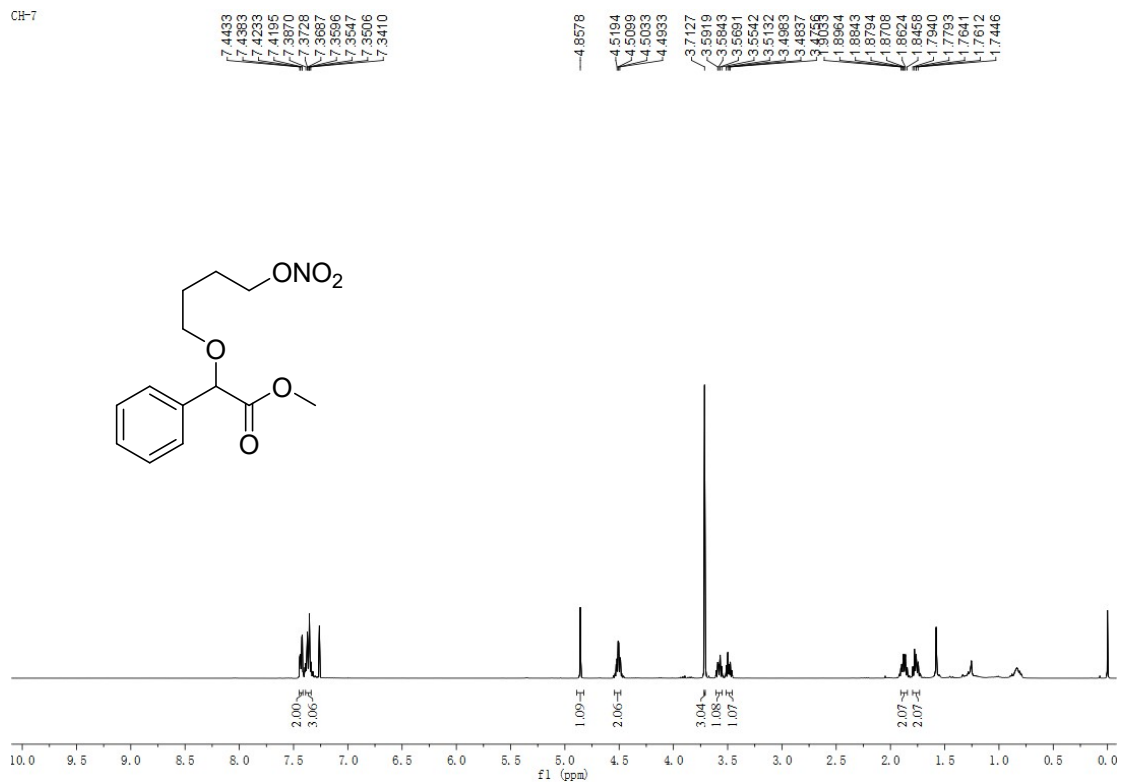**4aa** <sup>13</sup>C NMR (101 MHz, CDCl<sub>3</sub>)

CH-7

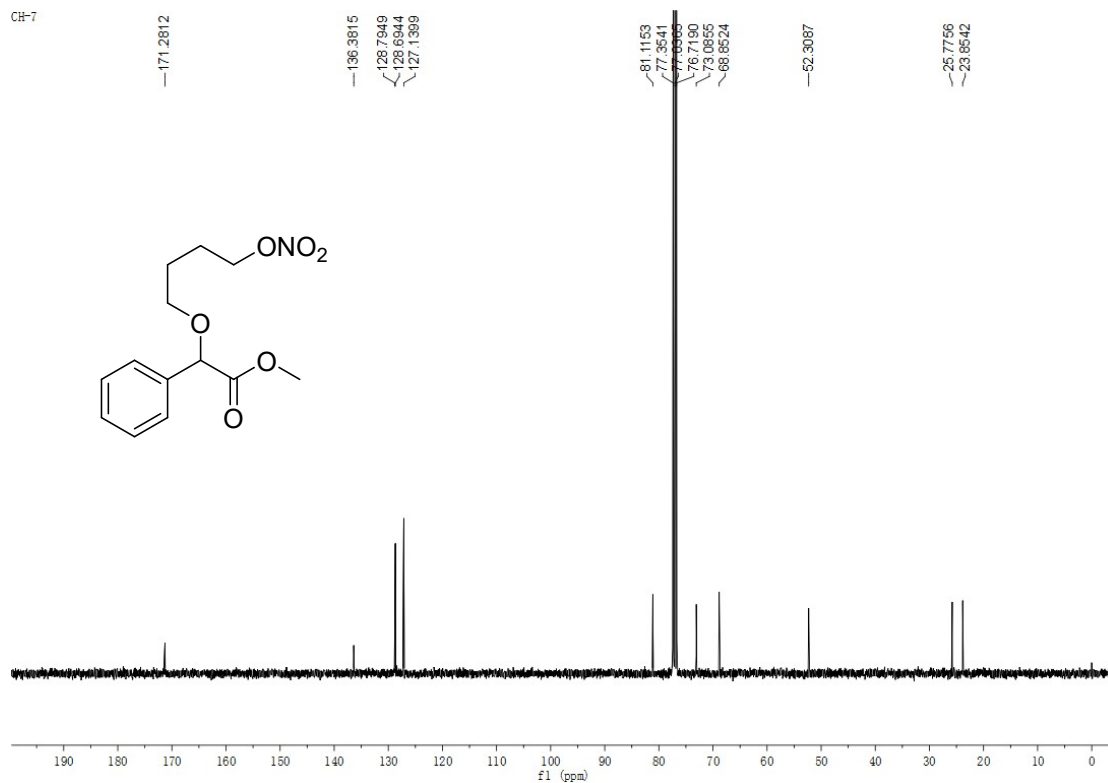**4ba** <sup>1</sup>H NMR (400 MHz, CDCl<sub>3</sub>)

4-JIAJI

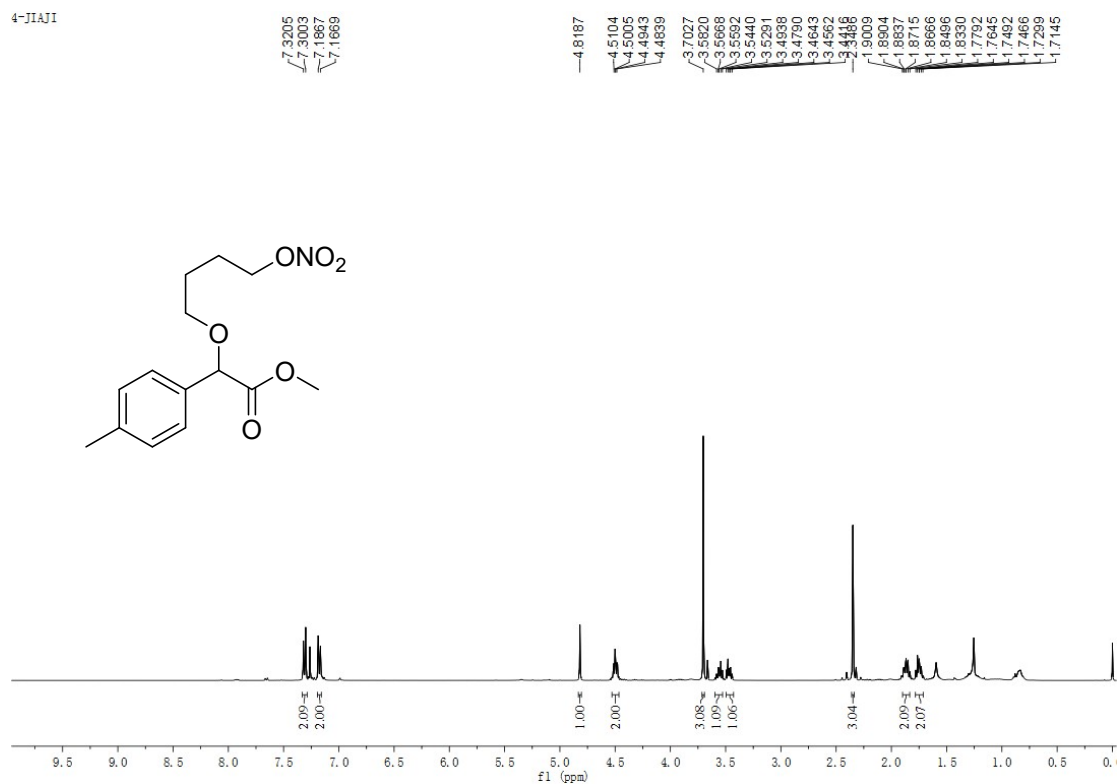

**4ba** <sup>13</sup>C NMR (101 MHz, CDCl<sub>3</sub>)

CH-11

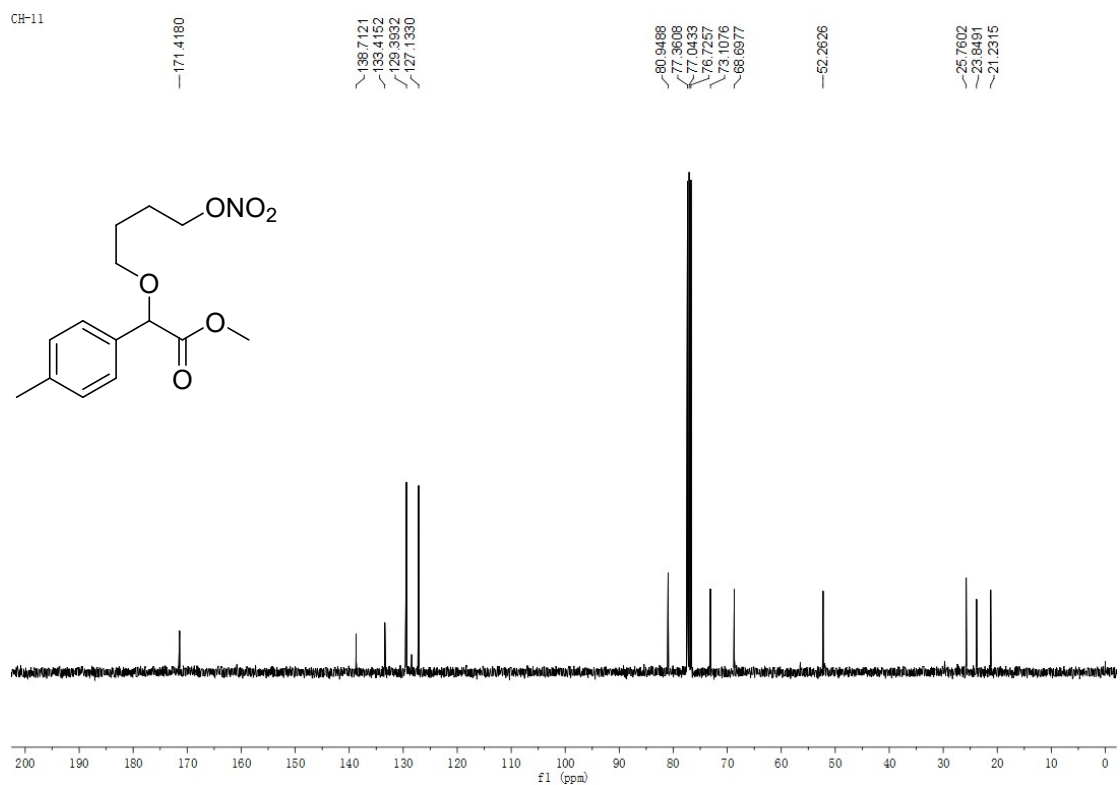

**4ca**  $^1\text{H}$  NMR (400 MHz,  $\text{CDCl}_3$ )

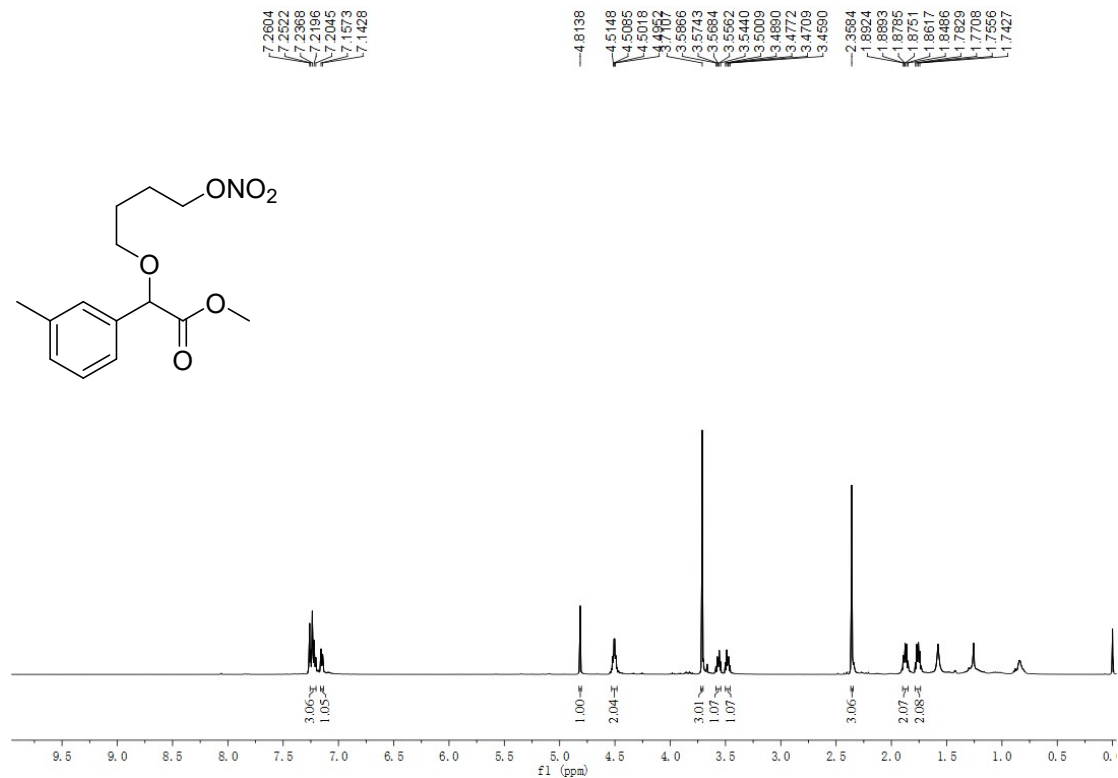

**4ca**  $^{13}\text{C}$  NMR (101 MHz,  $\text{CDCl}_3$ )

CH-15

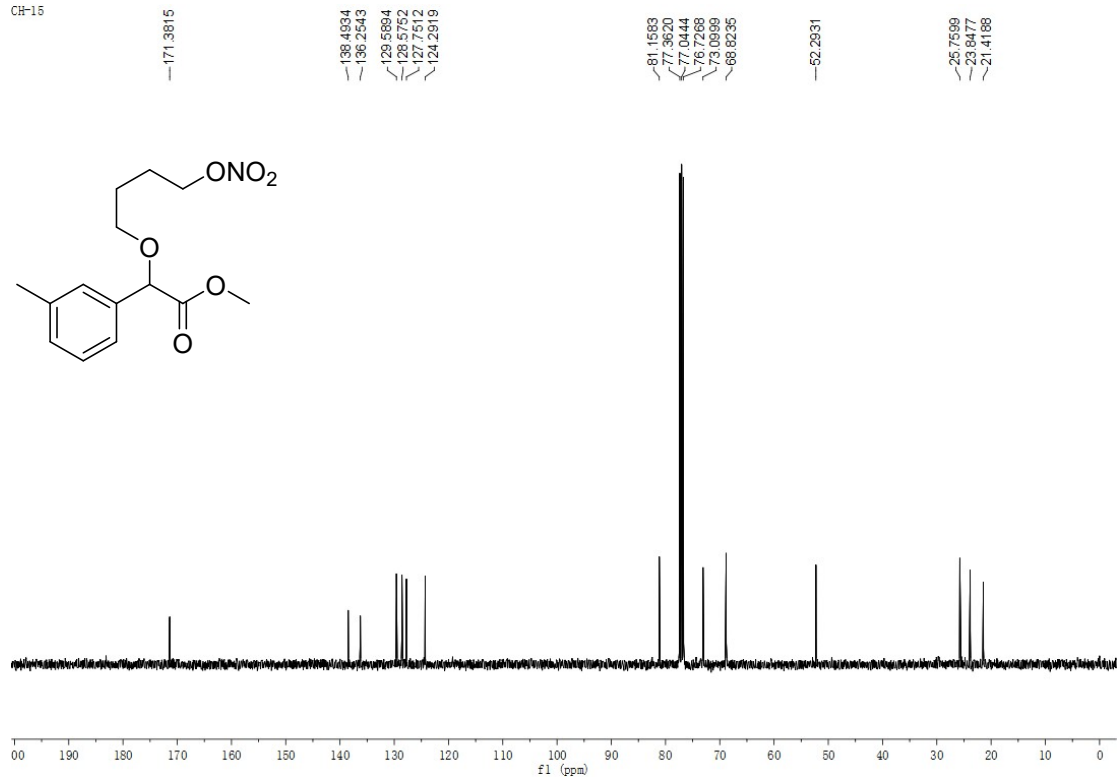

**4da**  $^1\text{H}$  NMR (400 MHz,  $\text{CDCl}_3$ )

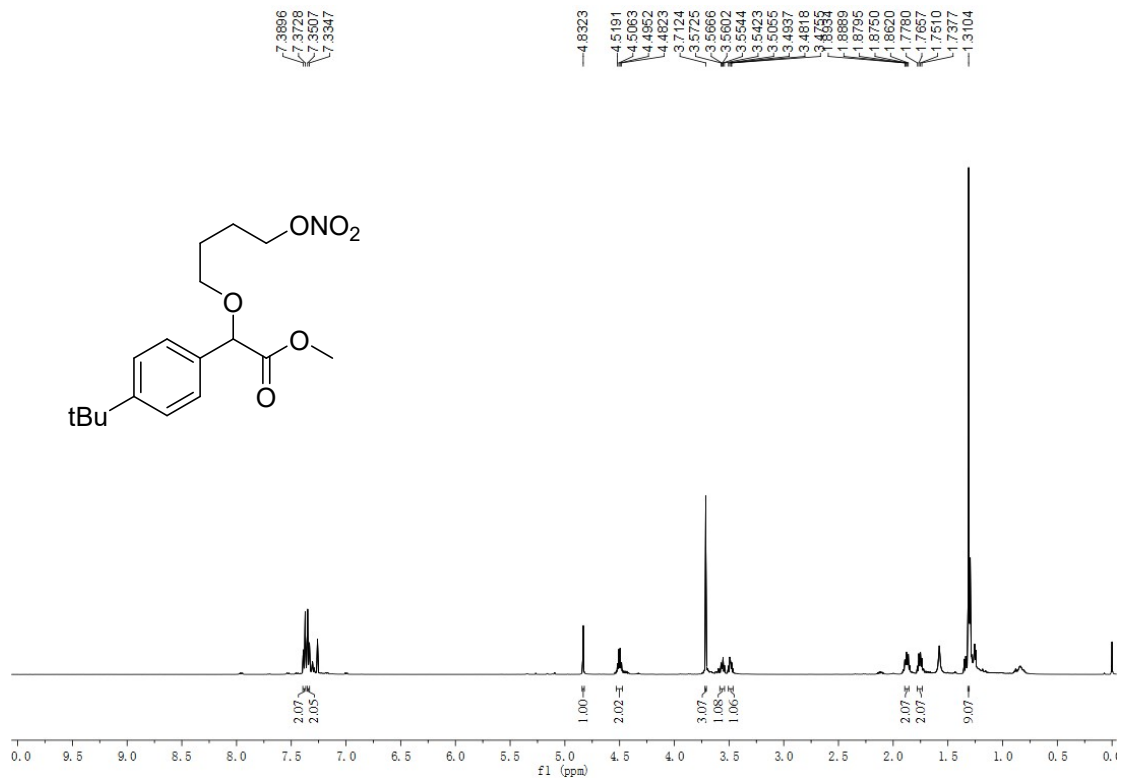

**4da**  $^{13}\text{C}$  NMR (101 MHz,  $\text{CDCl}_3$ )

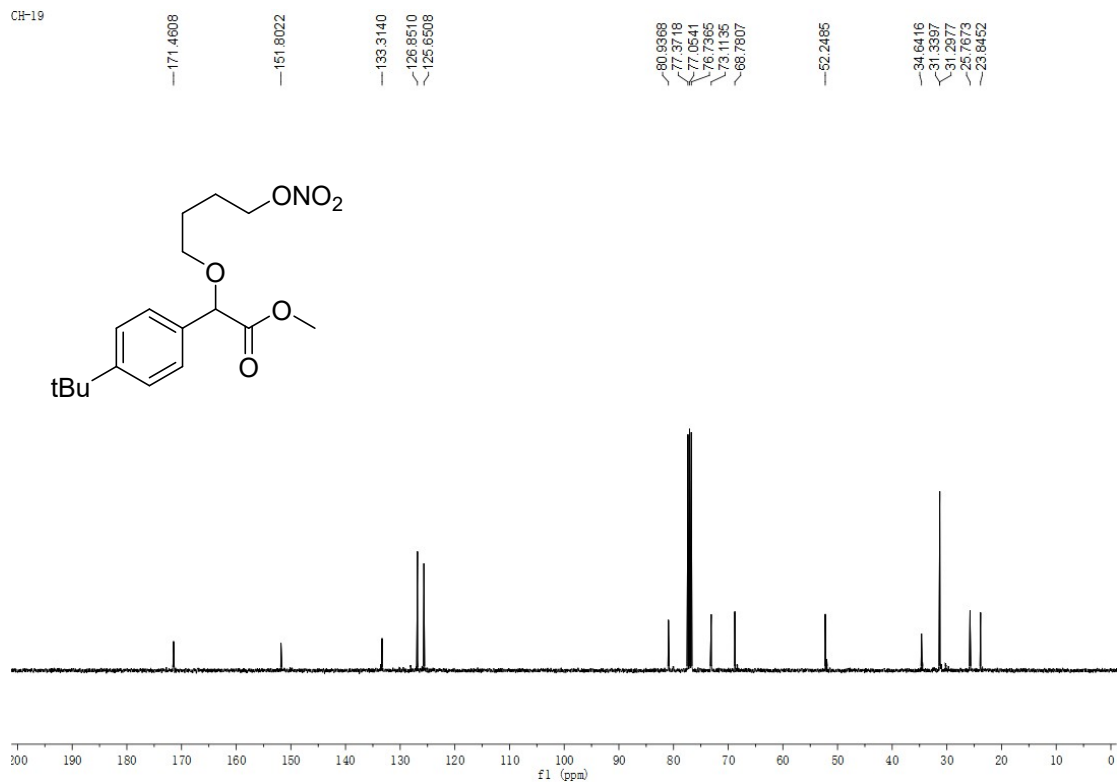

**4ea**  $^1\text{H}$  NMR (400 MHz,  $\text{CDCl}_3$ )

CH-4

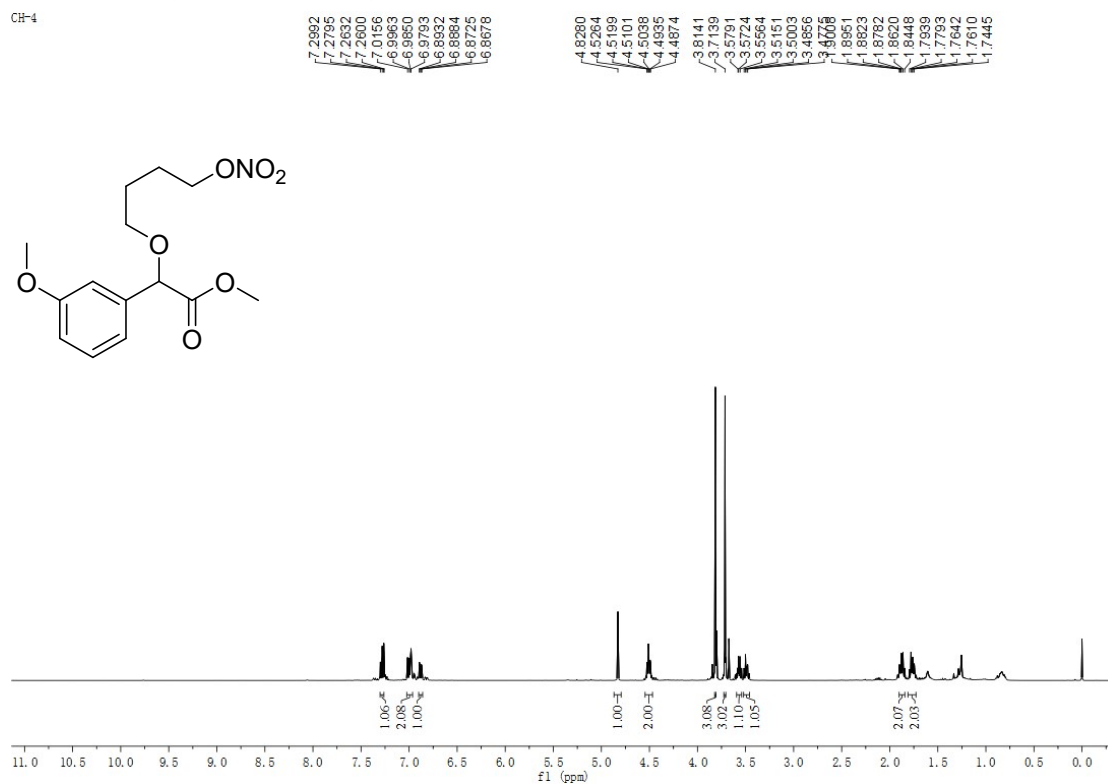

**4ea**  $^{13}\text{C}$  NMR (101 MHz,  $\text{CDCl}_3$ )

CH-4

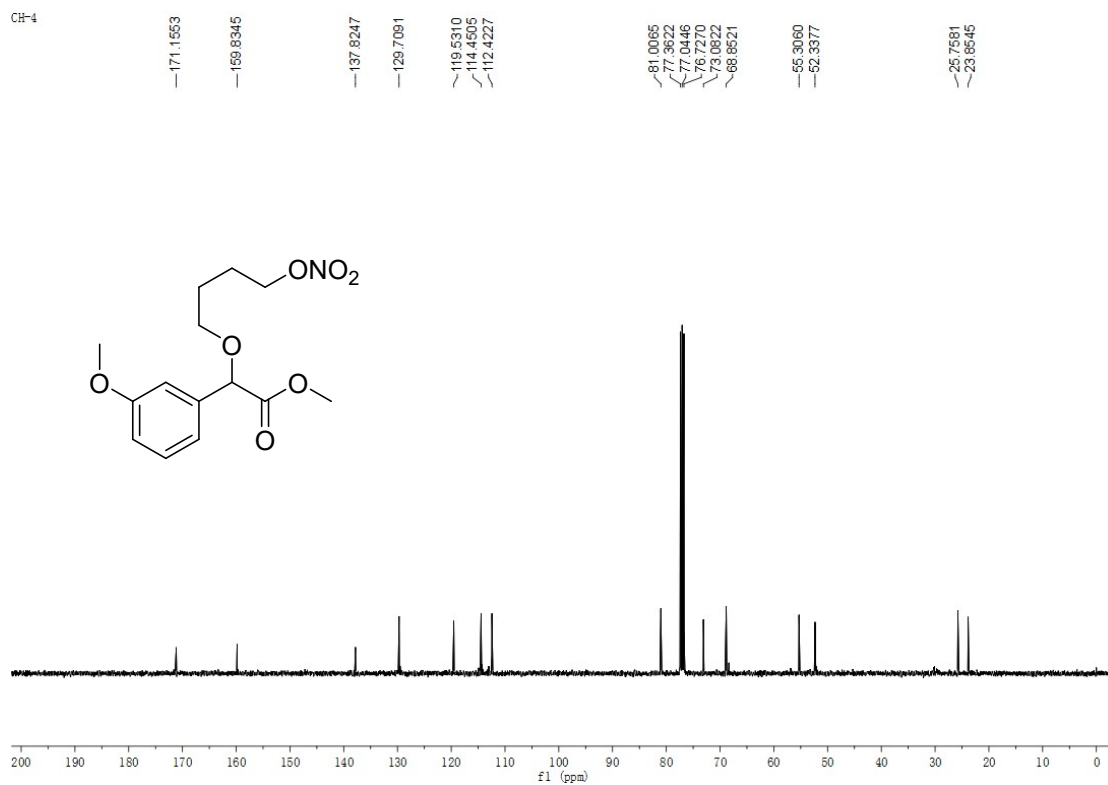





## CH-1

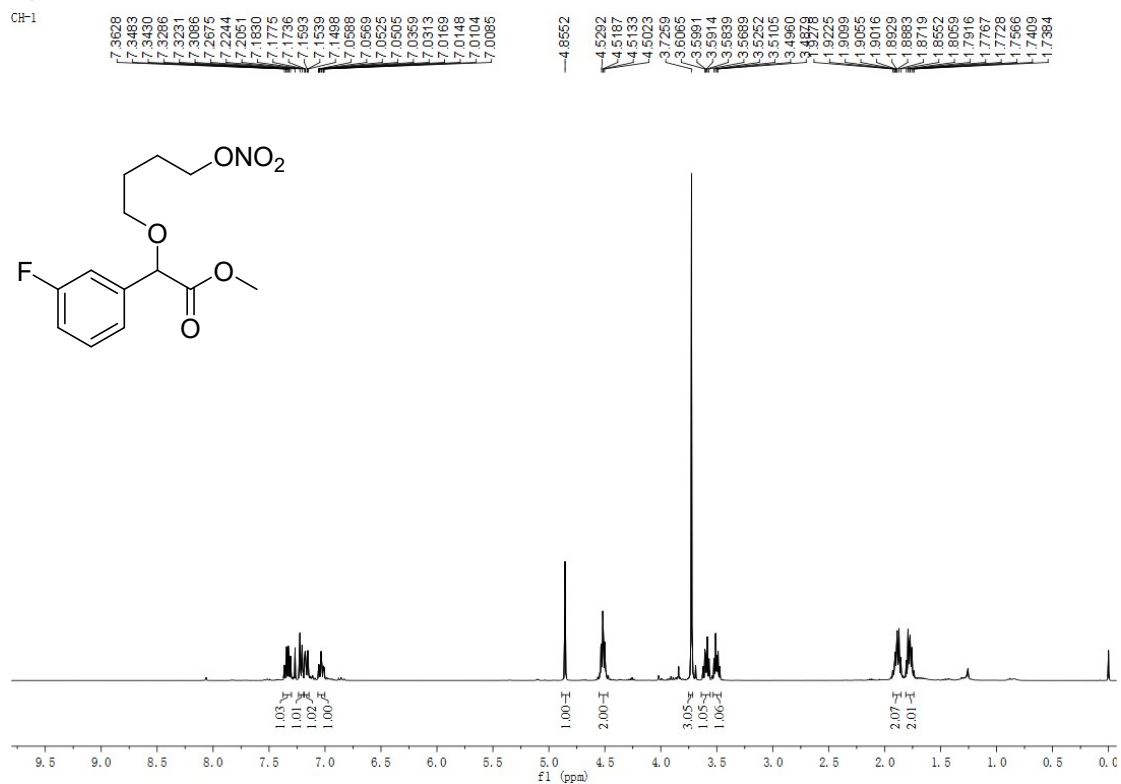

## CH-1

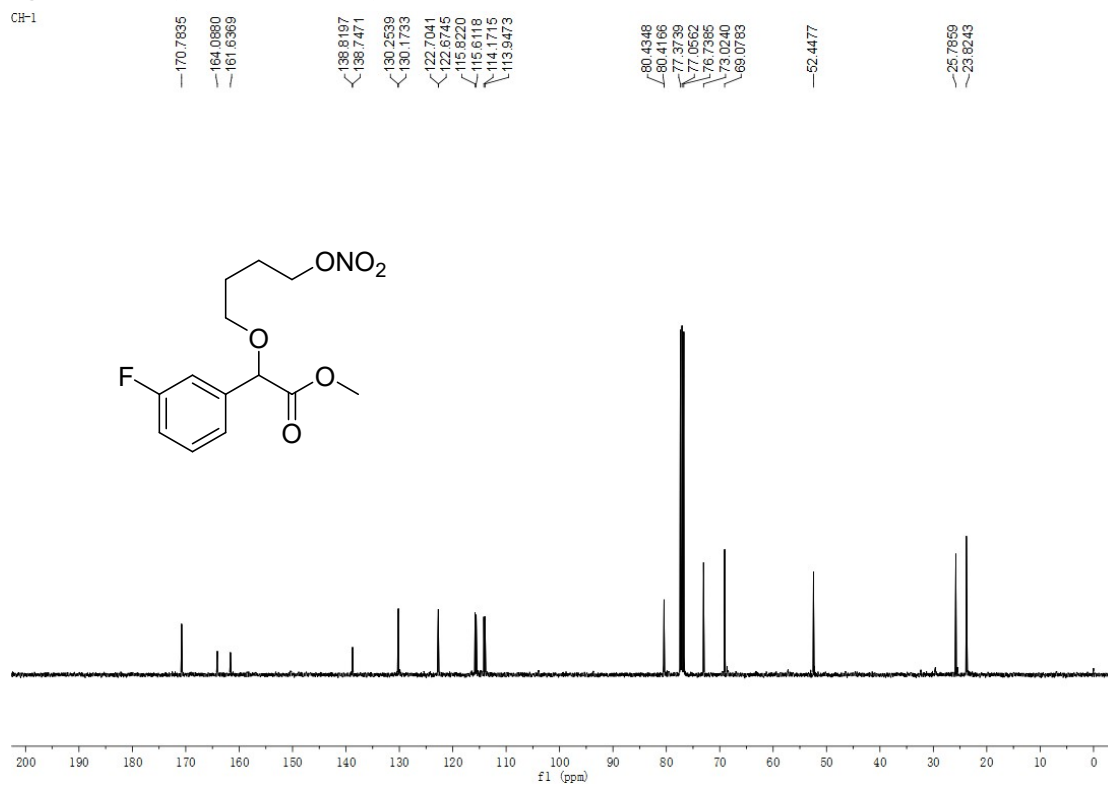

**4ha**  $^1\text{H}$  NMR (400 MHz,  $\text{CDCl}_3$ )

CH-8

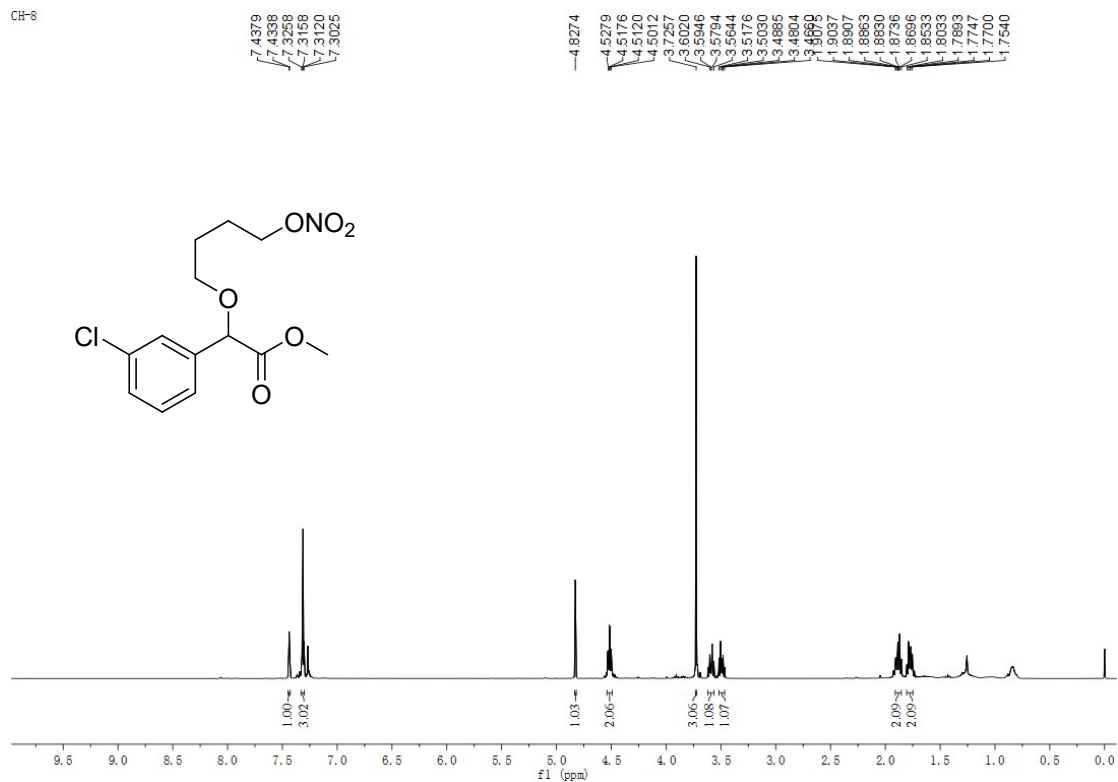

**4ha**  $^{13}\text{C}$  NMR (101 MHz,  $\text{CDCl}_3$ )

CH-8

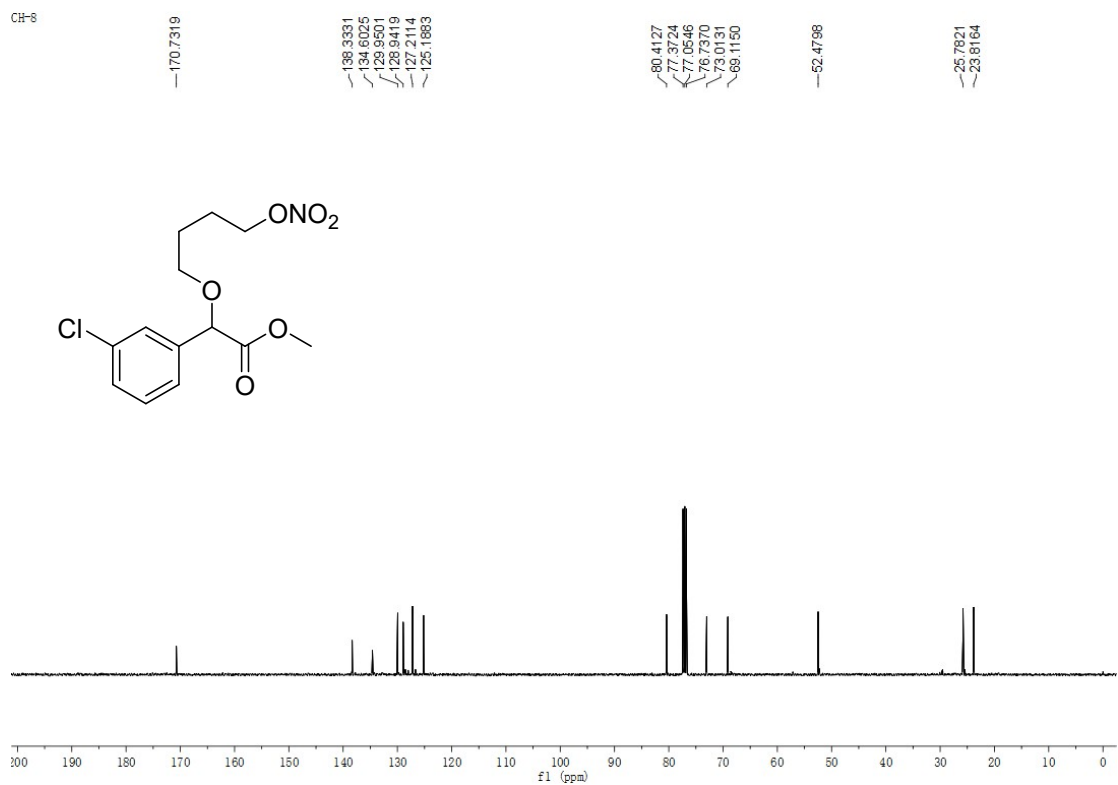



**4ia**  $^1\text{H}$  NMR (400 MHz,  $\text{CDCl}_3$ )

CH-10

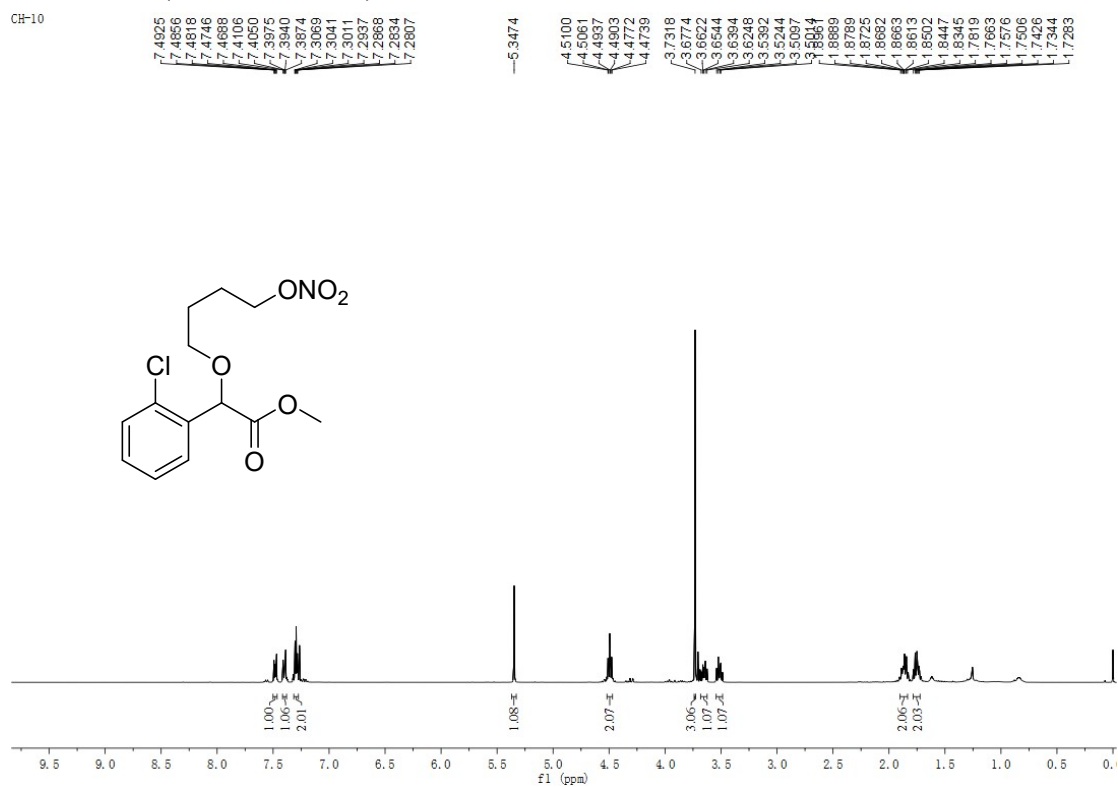

**4ia**  $^{13}\text{C}$  NMR (100 MHz,  $\text{CDCl}_3$ )

CH-10

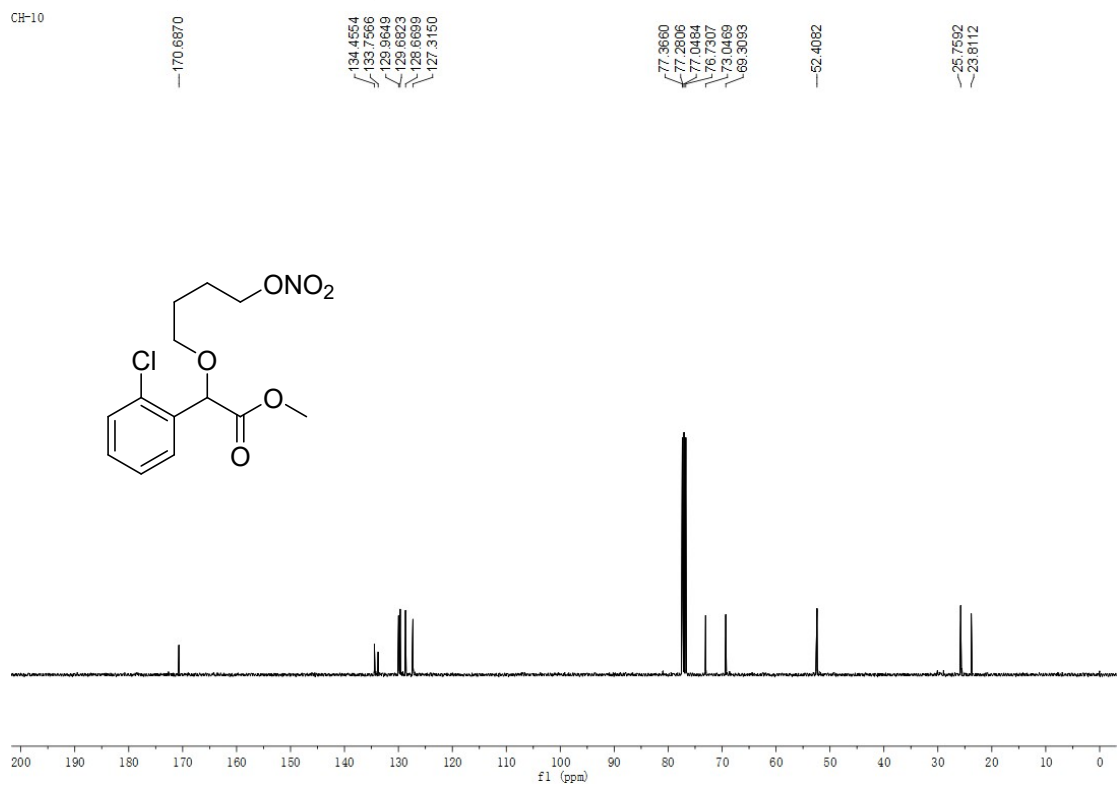

**4ja**  $^1\text{H}$  NMR (400 MHz,  $\text{CDCl}_3$ )

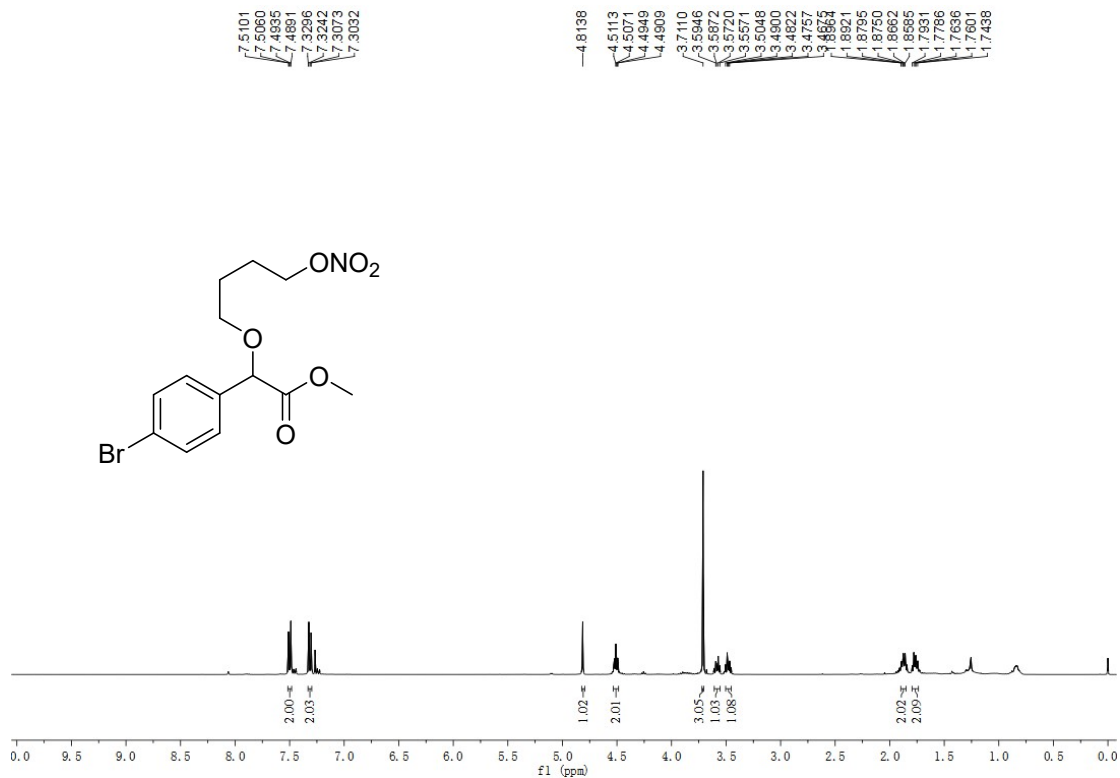

**4ja**  $^{13}\text{C}$  NMR (101 MHz,  $\text{CDCl}_3$ )

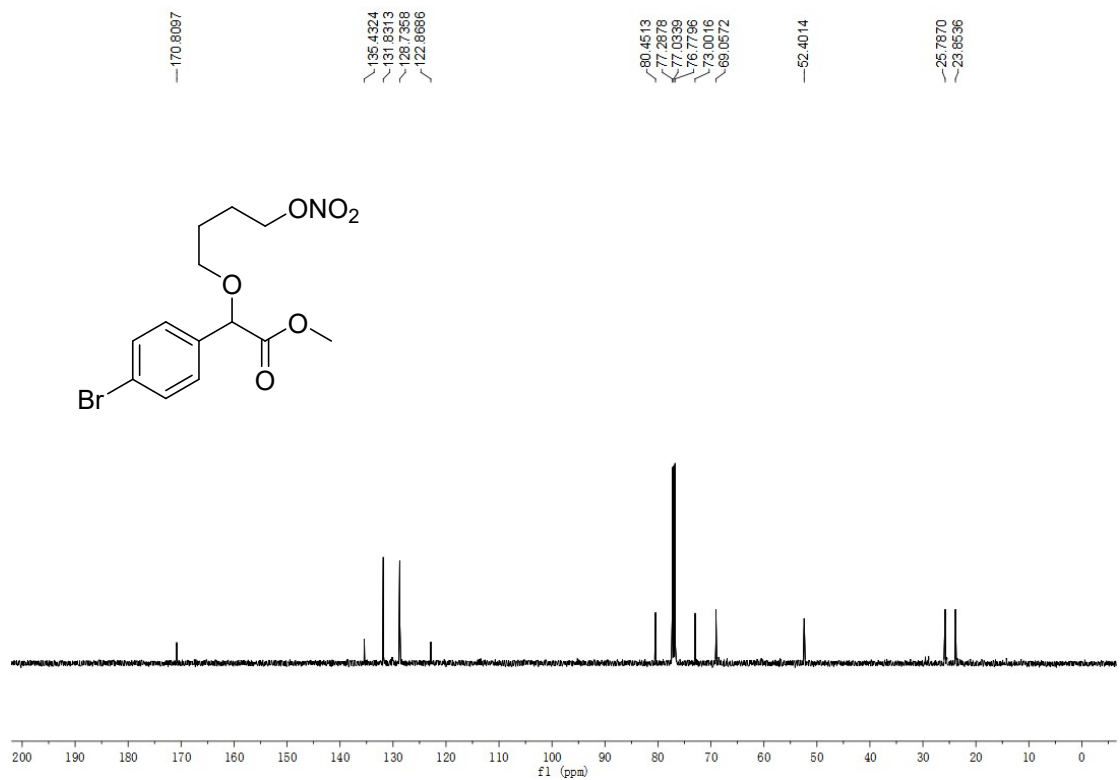

CCOC(=O)C(c1ccc(C(F)(F)F)cc1)OCCON=[N+]([O-])=O

7.6382, 7.6216, 7.5834, 7.5671, 4.8938, 4.5281, 4.5232, 4.1881, 4.1780, 4.1638, 3.6434, 3.6376, 3.6254, 3.6133, 3.5220, 3.5104, 3.5040, 1.9007, 1.8973, 1.8840, 1.7985, 1.7868, 1.7840, 1.7404, 1.2262, 1.2119

2.00, 2.01, 1.00, 2.06, 2.11, 1.07, 1.08, 2.03, 2.03, 3.18

f1 (ppm)

Chemical structure: CCOC(=O)C(OCCON)C1=CC=C(C(F)(F)F)C=C1

<sup>13</sup>C NMR spectrum (ppm):

- 170.1395
- 140.4490
- 130.9524
- 130.6942
- 128.8700
- 127.3048
- 126.6016
- 126.2710
- 125.4442
- 125.5112
- 125.0189
- 122.8791
- 80.5862
- 77.2745
- 77.0204
- 76.7664
- 72.9917
- 69.2358
- 61.5761
- 25.8156
- 23.8863
- 14.0597

**4la**  $^1\text{H}$  NMR (400 MHz,  $\text{CDCl}_3$ )

CH-9

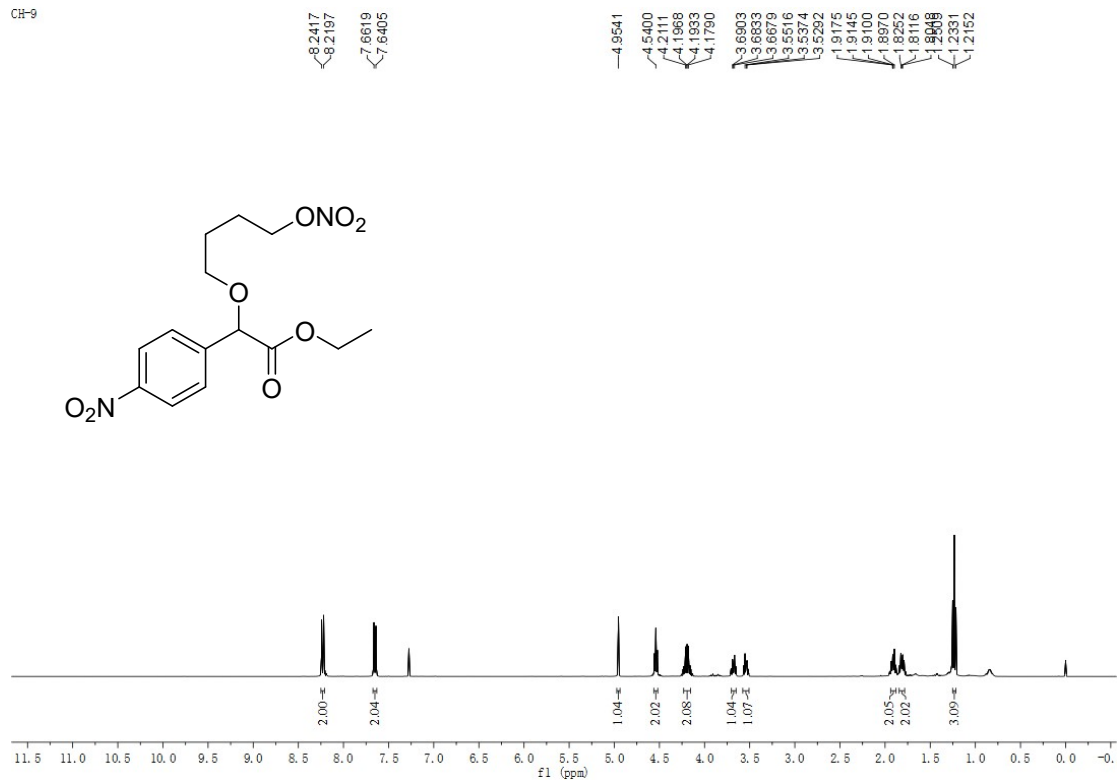

**4la**  $^{13}\text{C}$  NMR (101 MHz,  $\text{CDCl}_3$ )

CH-9

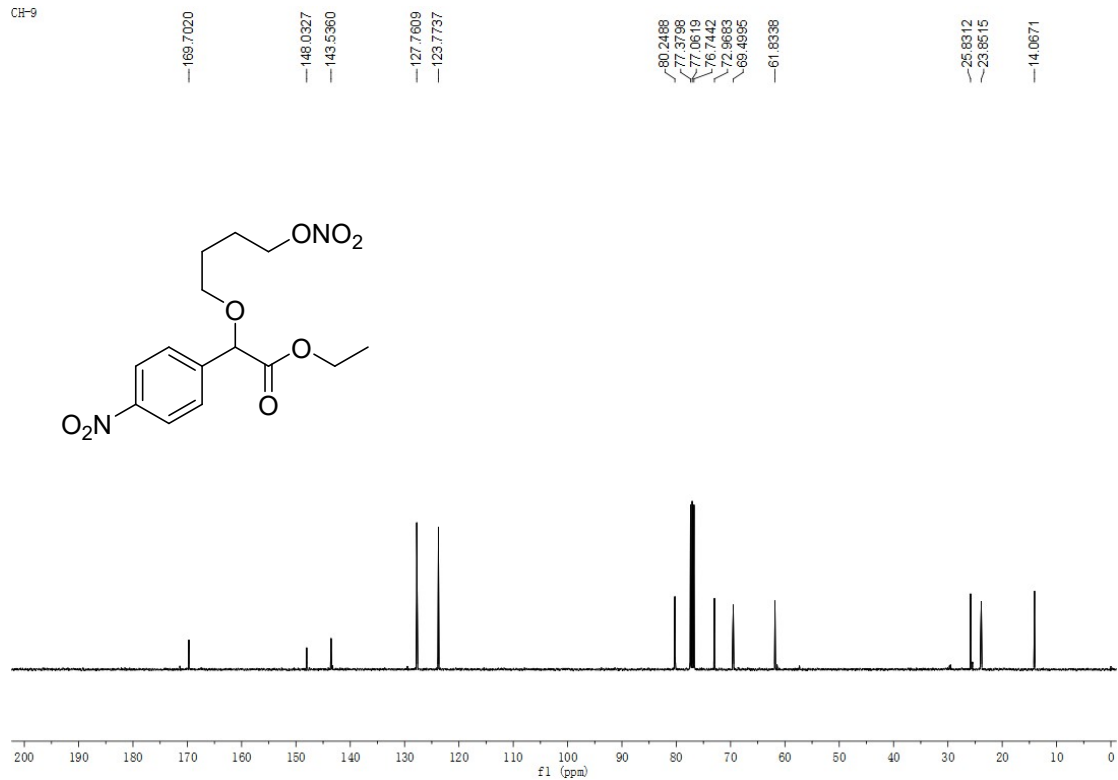

**4ma**  $^1\text{H}$  NMR (400 MHz,  $\text{CDCl}_3$ )

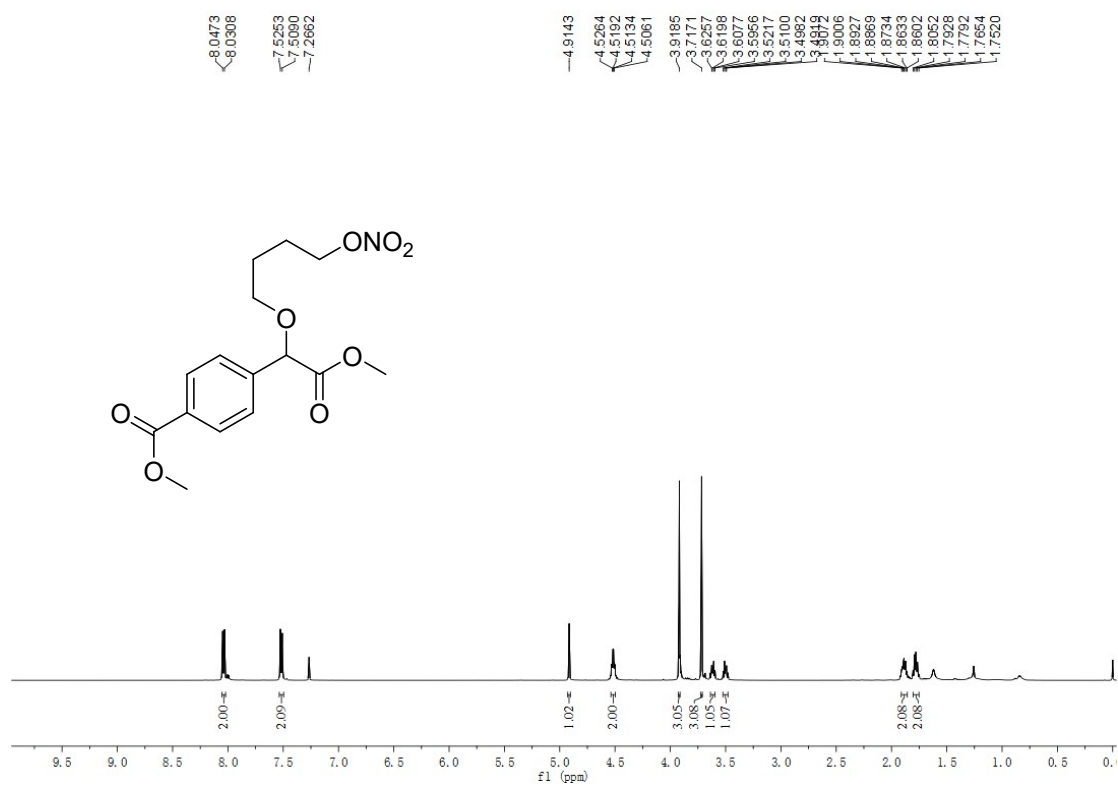

**4ma**  $^{13}\text{C}$  NMR (101 MHz,  $\text{CDCl}_3$ )

CH-14

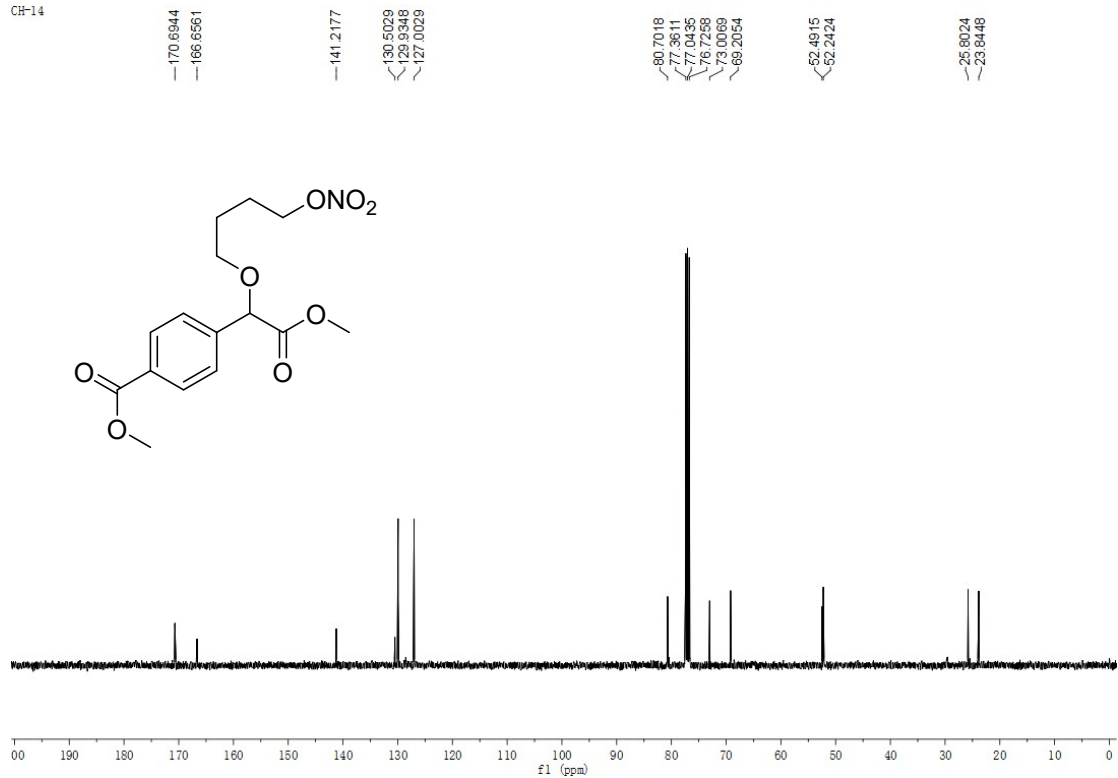

**4na**  $^1\text{H}$  NMR (400 MHz,  $\text{CDCl}_3$ )

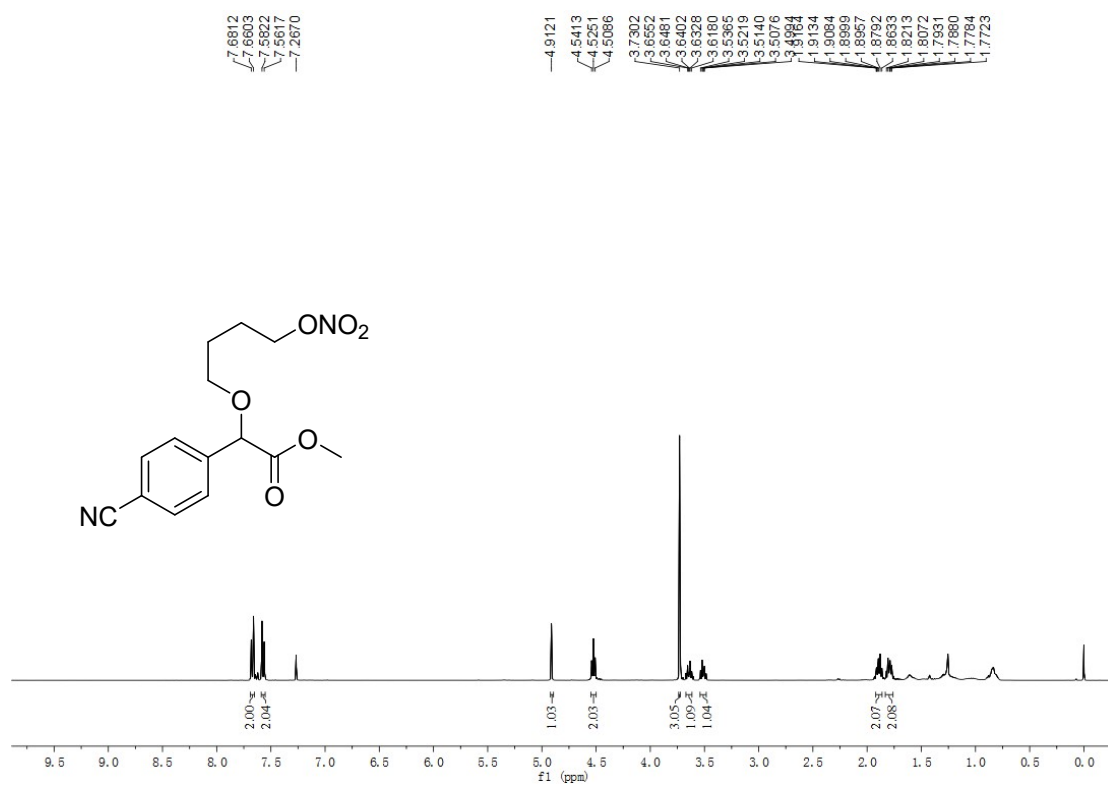

**4na**  $^{13}\text{C}$  NMR (101 MHz,  $\text{CDCl}_3$ )

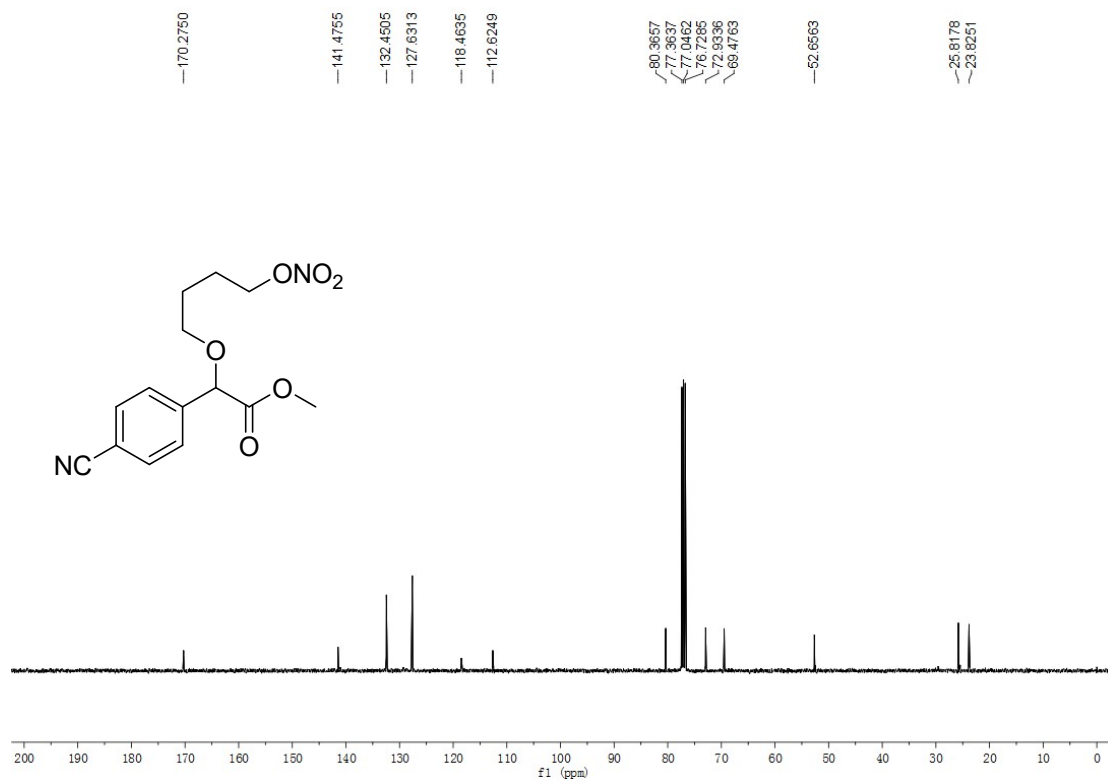

**40a**  $^1\text{H}$  NMR (500 MHz,  $\text{CDCl}_3$ )

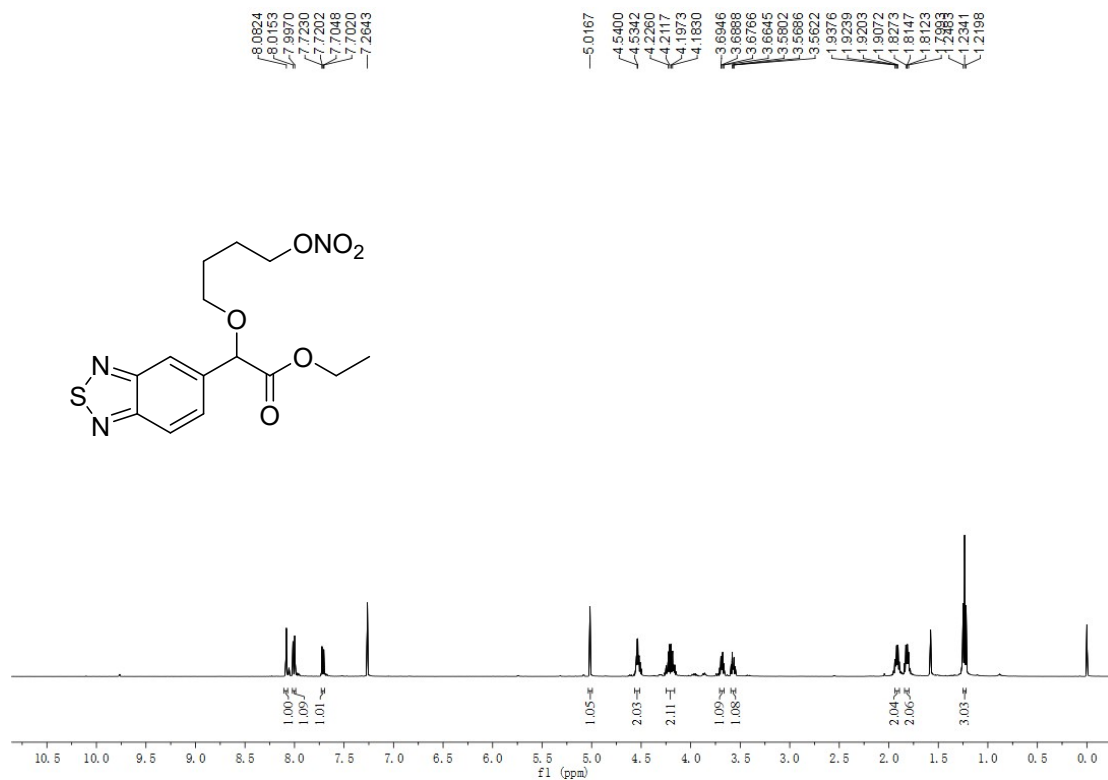

**40a**  $^{13}\text{C}$  NMR (126 MHz,  $\text{CDCl}_3$ )

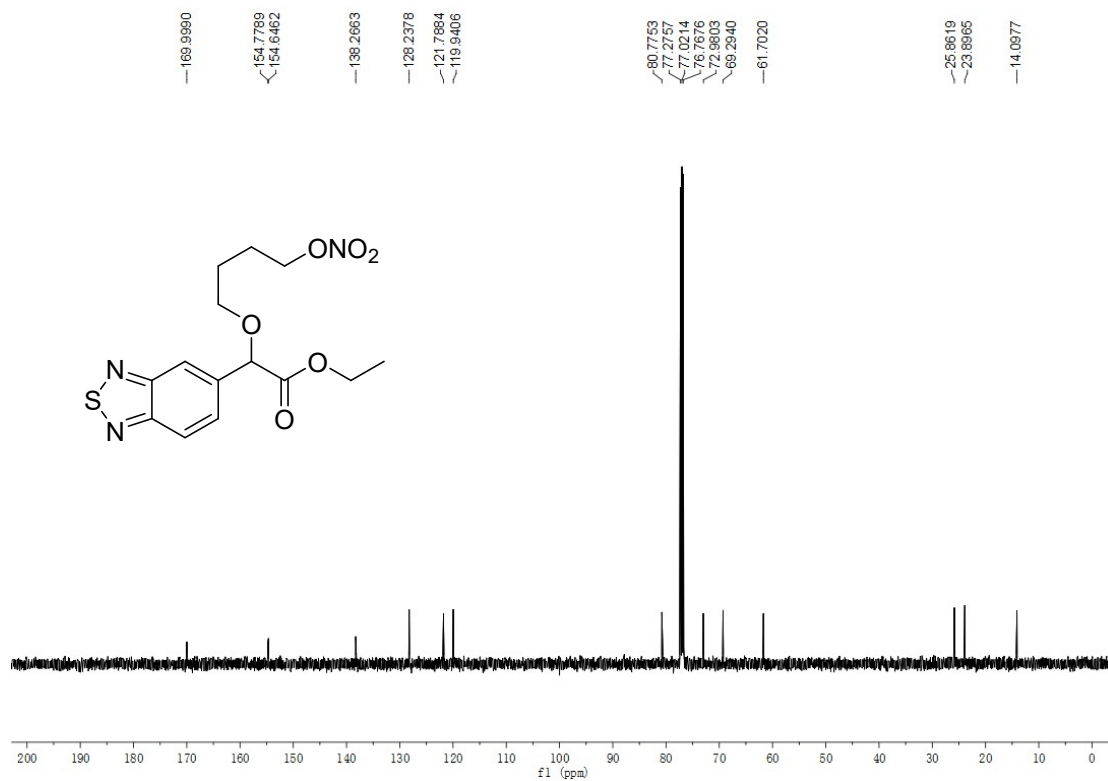

**4pa**  $^1\text{H}$  NMR (400 MHz,  $\text{CDCl}_3$ )

CH-25

7.4483  
7.4437  
7.4393  
7.4382  
7.4248  
7.3808  
7.3657  
7.3618  
7.3516  
7.3467  
7.3420  
7.3319

4.8365  
4.5138  
4.5070  
4.1967  
4.1788  
4.1644  
4.1466  
3.5982  
3.5906  
3.5755  
3.5605  
3.5185  
3.5037  
3.4892  
3.4810  
1.8874  
1.8833  
1.8804  
1.8666  
1.7792  
1.7645  
1.7603  
1.2442  
1.2147  
1.1968

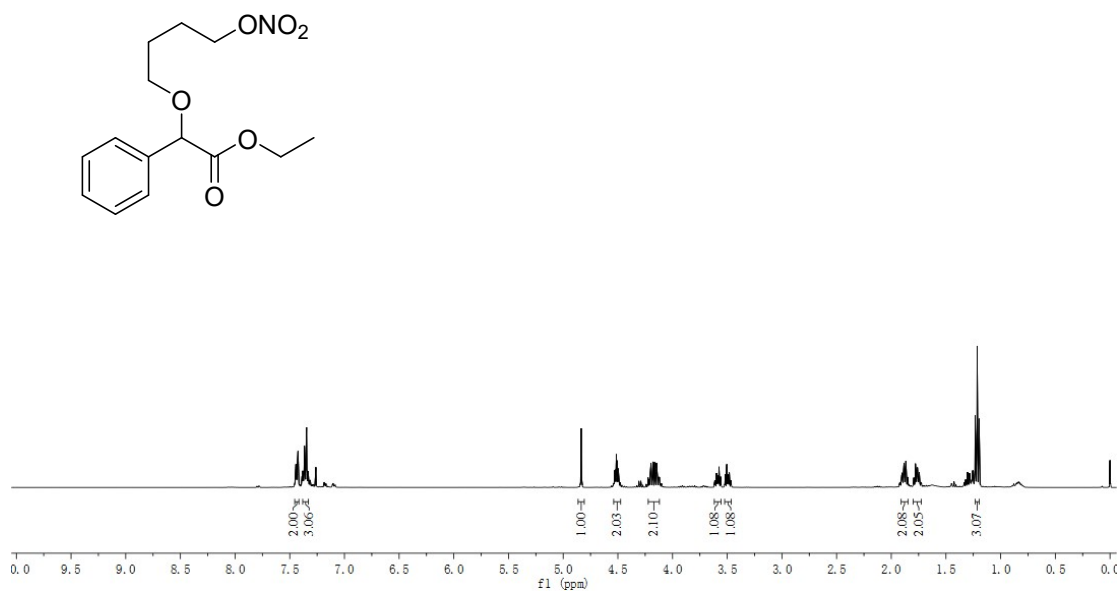

**4pa**  $^{13}\text{C}$  NMR (101 MHz,  $\text{CDCl}_3$ )

CH-25

170.8460  
136.5212  
128.6876  
128.6274  
127.1034

81.1781  
77.3702  
77.0525  
76.7349  
73.1211  
68.8142  
61.2616

25.7828  
23.8887  
14.1033

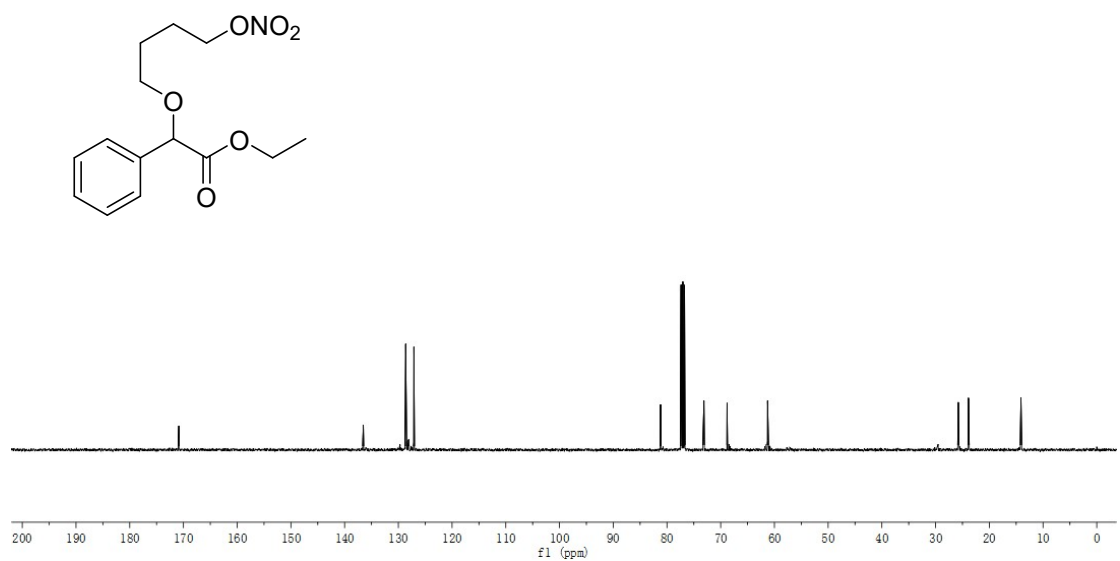

**4qa**  $^1\text{H}$  NMR (400 MHz,  $\text{CDCl}_3$ )

CH-5

7.4446  
7.4400  
7.4245  
7.4210  
7.3833  
7.3766  
7.3617  
7.3579  
7.3469  
7.3425  
7.3377  
7.3274  
7.2618

4.8370  
4.5136  
4.5080  
4.1133  
4.1078  
3.6002  
3.5926  
3.5775  
3.5190  
3.5043  
3.4898  
3.4816  
1.8847  
1.8679  
1.7801  
1.5724  
1.5561  
1.5534  
1.5352  
1.2893  
1.2704  
0.8578  
0.8585  
0.8400

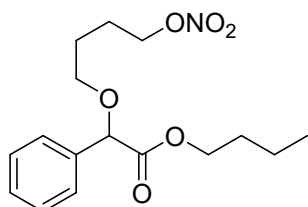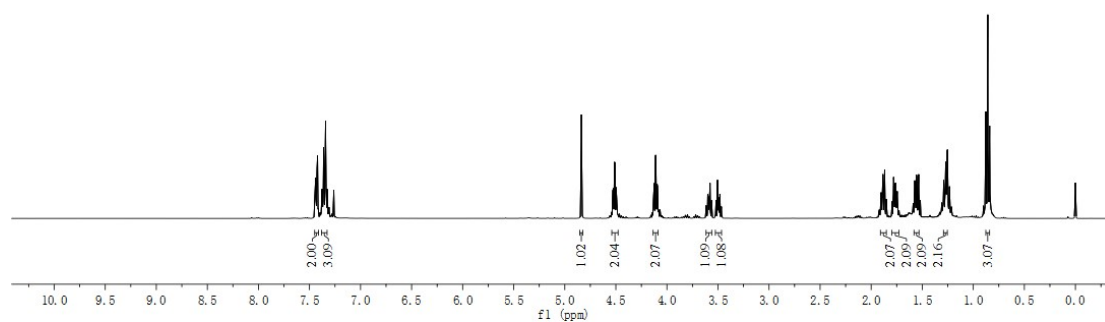

**4qa**  $^{13}\text{C}$  NMR (101 MHz,  $\text{CDCl}_3$ )

CH-5

170.9315

136.5888  
128.6674  
128.6000  
128.5482  
127.0812

81.1867  
77.3703  
77.0527  
76.7360  
73.1288  
68.9148  
65.0554

30.4959  
25.7925  
23.8911  
18.9460  
13.5980

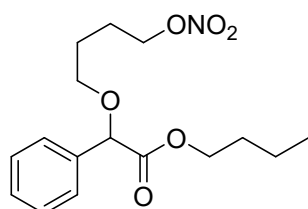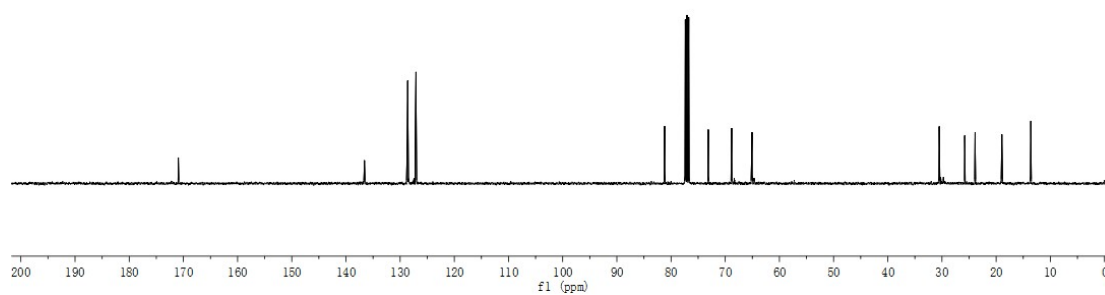

**4ra**  $^1\text{H}$  NMR (400 MHz,  $\text{CDCl}_3$ )

CH-24

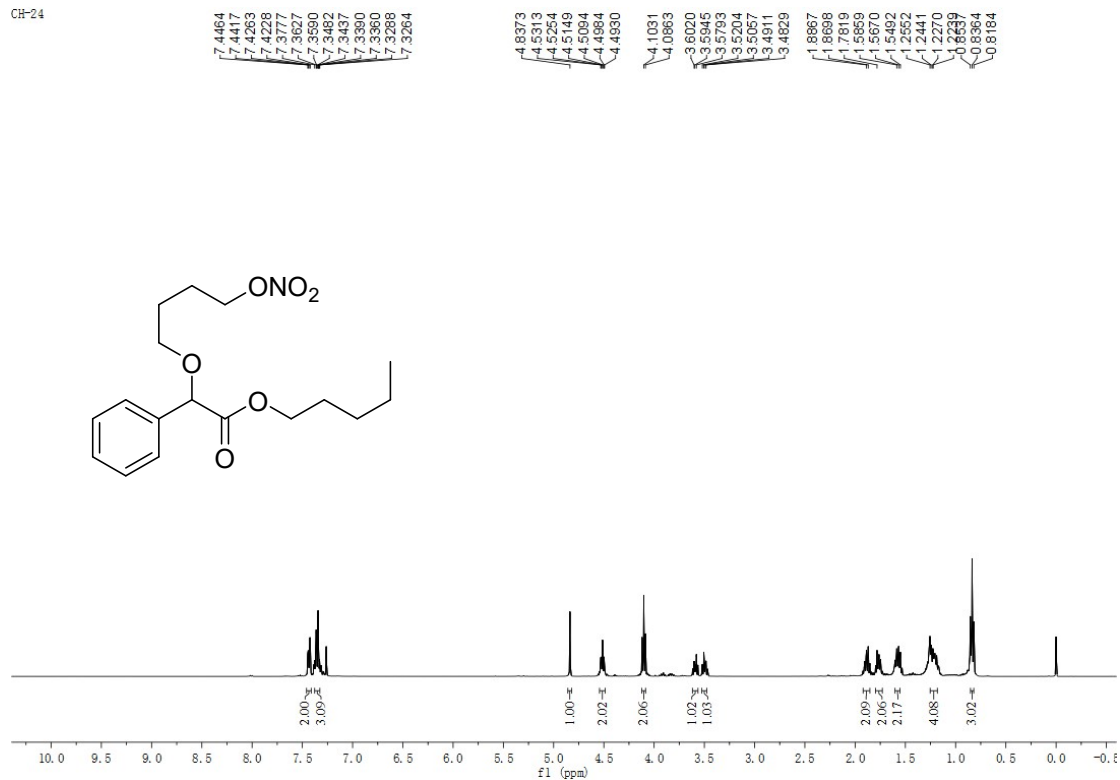

**4ra**  $^{13}\text{C}$  NMR (101 MHz,  $\text{CDCl}_3$ )

CH-24

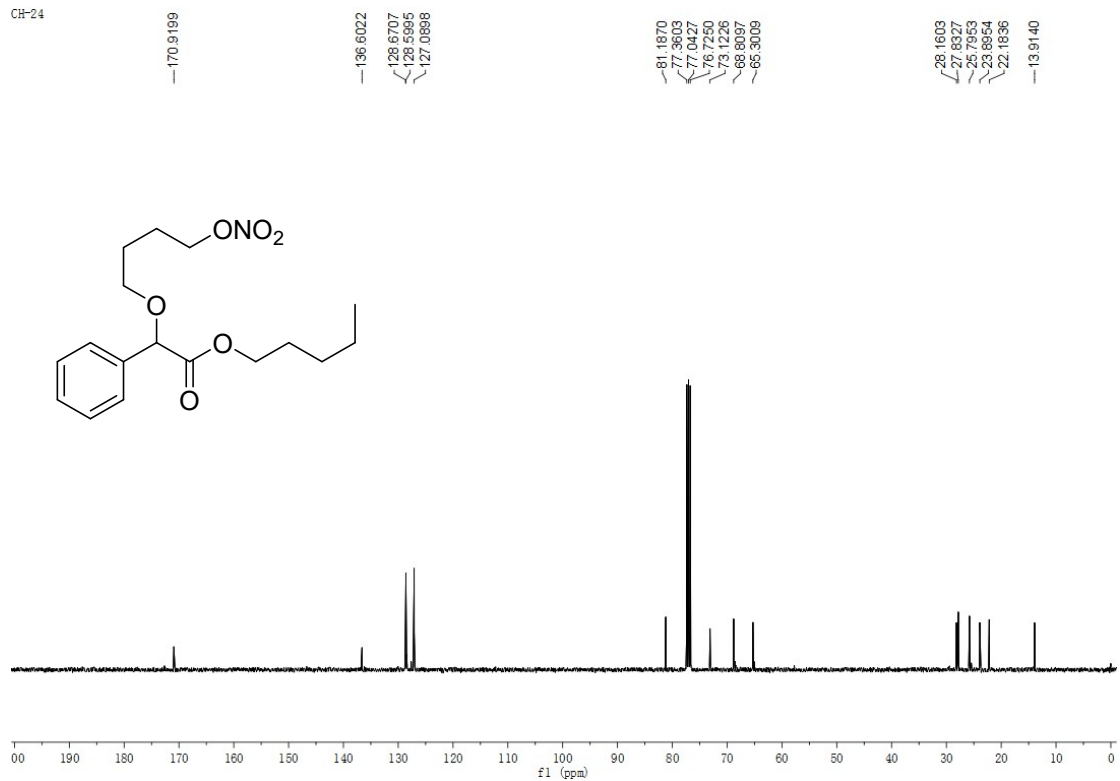

**4sa**  $^1\text{H}$  NMR (400 MHz,  $\text{CDCl}_3$ )

CH-3

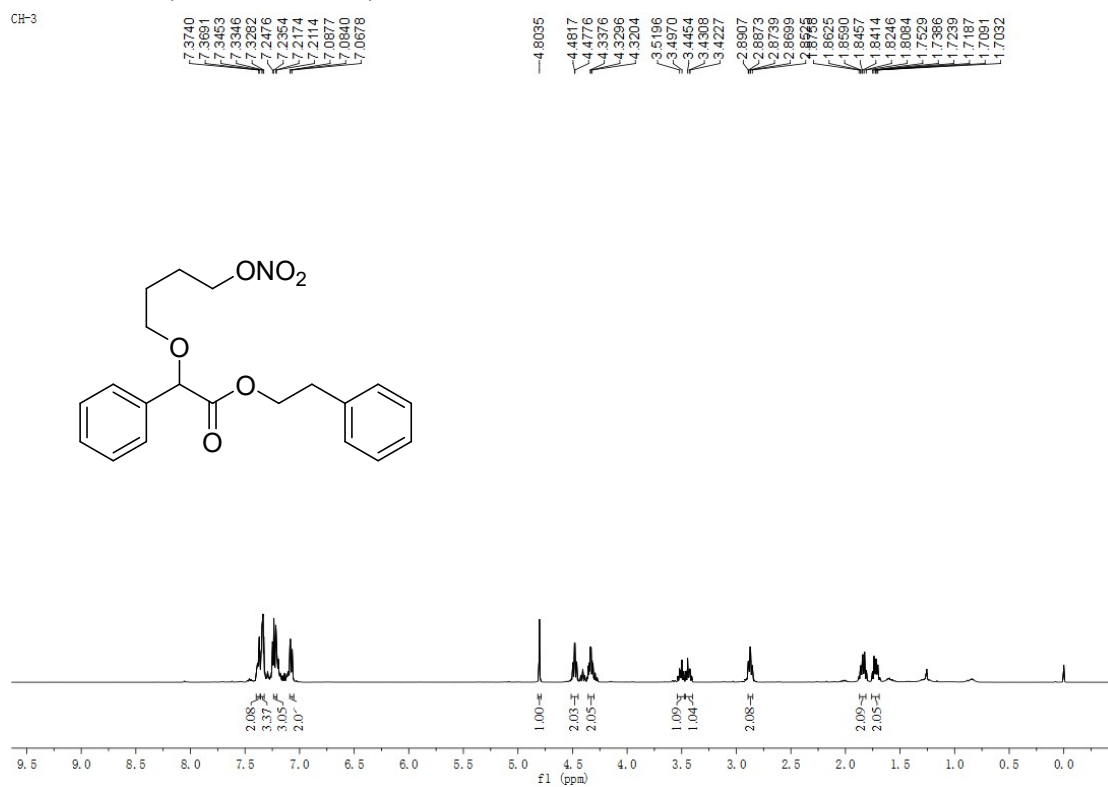

**4sa**  $^{13}\text{C}$  NMR (101 MHz,  $\text{CDCl}_3$ )

CH-3

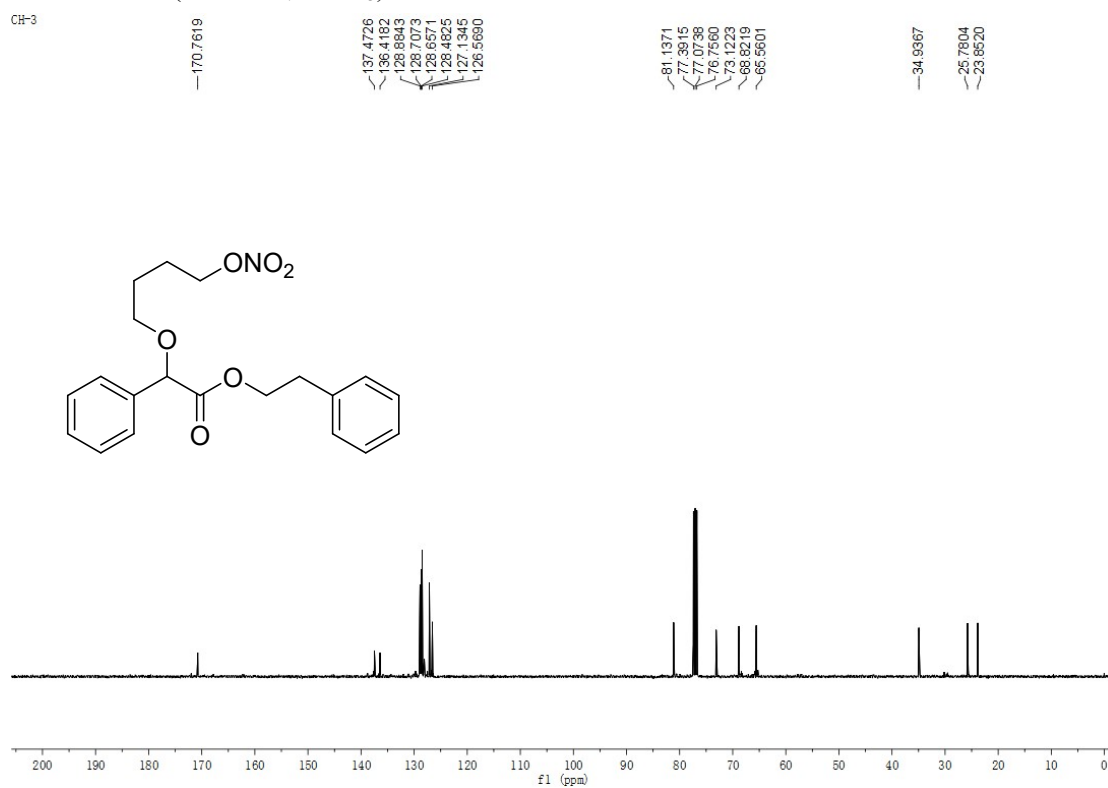

CCOC(=O)C(c1ccccc1)OCCO[N+](=O)[O-]

Chemical structure: CCOC(=O)C(c1ccccc1)OCCO[N+](=O)[O-]

<sup>1</sup>H NMR spectrum (ppm):

- 7.437, 7.4309, 7.4190, 7.3643, 7.3550, 7.342, 7.3063, 7.2995, 7.2959, 7.2236, 7.2170, 7.2088
- 5.1768, 5.1518, 5.1321, 5.1073, 4.8909, 4.4905, 4.4871, 4.4773, 4.4642, 3.6039, 3.5889, 3.5769, 3.5710, 3.5589, 3.5469, 3.5132, 3.5015, 3.4899, 3.4835, 3.4719
- 1.8674, 1.8534, 1.8378, 1.8246, 1.7671, 1.7549, 1.7396, 1.7269

Integration values (from left to right): 2.00, 3.00, 3.04, 2.07, 2.05, 1.00, 2.01, 1.06, 1.02, 2.09, 2.05.

CH-18

—170.6882

136.3192  
135.4325  
128.7786  
128.6648  
128.5399  
128.3251  
128.0347  
127.1602

81.1717  
77.3761  
77.0585  
76.7409  
73.0975  
68.8856  
66.8100

25.7822  
23.8666

Chemical structure: CCOC(=O)C(c1ccccc1)OCCCO[N+](=O)[O-]

13C NMR spectrum (ppm):

- 170.6882
- 136.3192
- 135.4325
- 128.7786
- 128.6648
- 128.5399
- 128.3251
- 128.0347
- 127.1602
- 81.1717
- 77.3761
- 77.0585
- 76.7409
- 73.0975
- 68.8856
- 66.8100
- 25.7822
- 23.8666

**4ua**  $^1\text{H}$  NMR (400 MHz,  $\text{CDCl}_3$ )

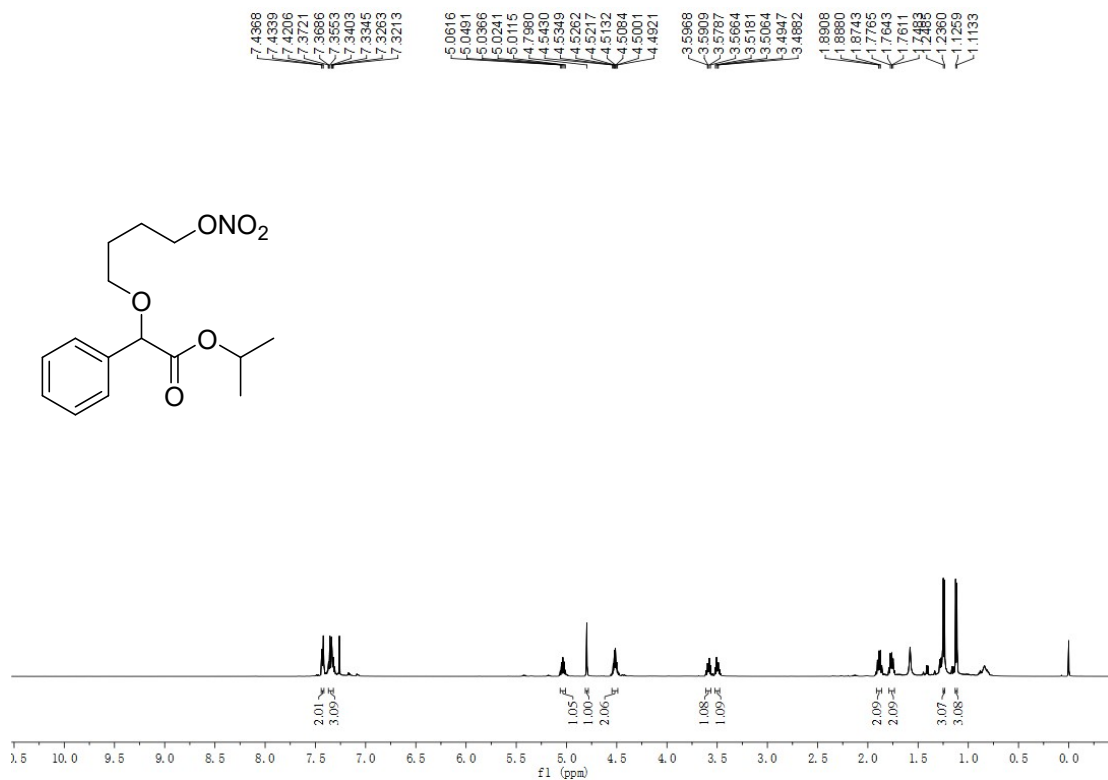

**4ua**  $^{13}\text{C}$  NMR (101 MHz,  $\text{CDCl}_3$ )

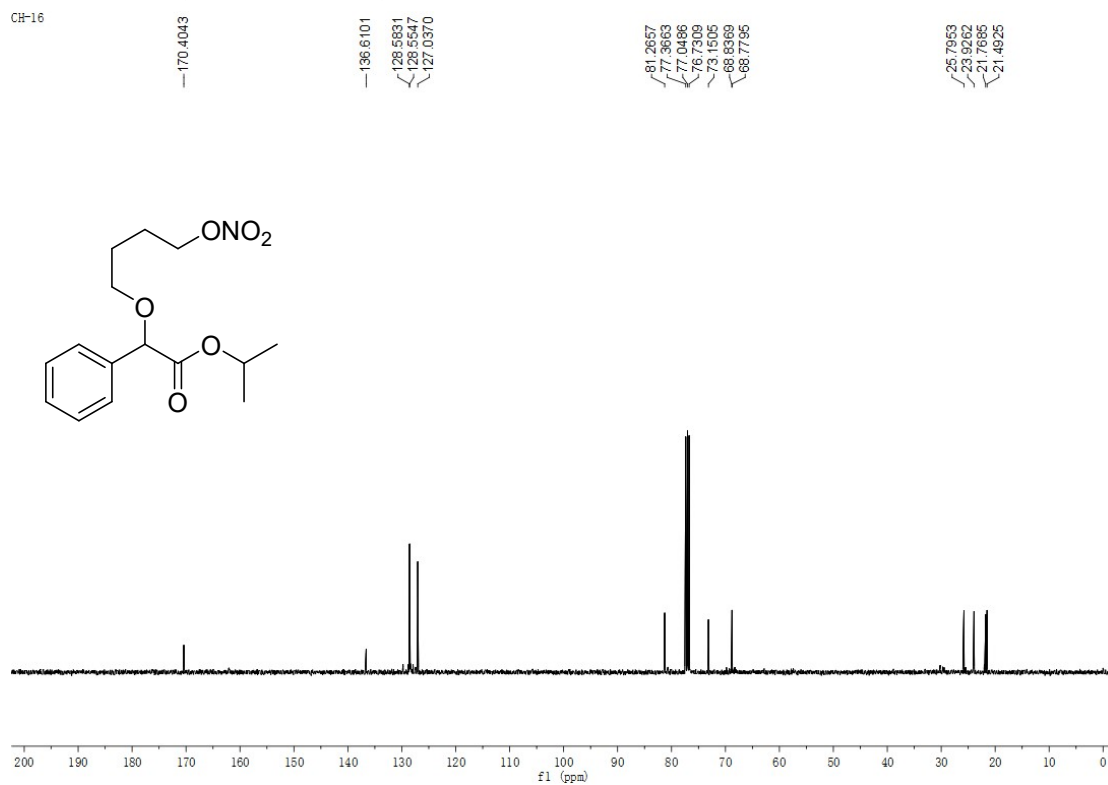

**4va**  $^1\text{H}$  NMR (400 MHz,  $\text{CDCl}_3$ )

CH-6

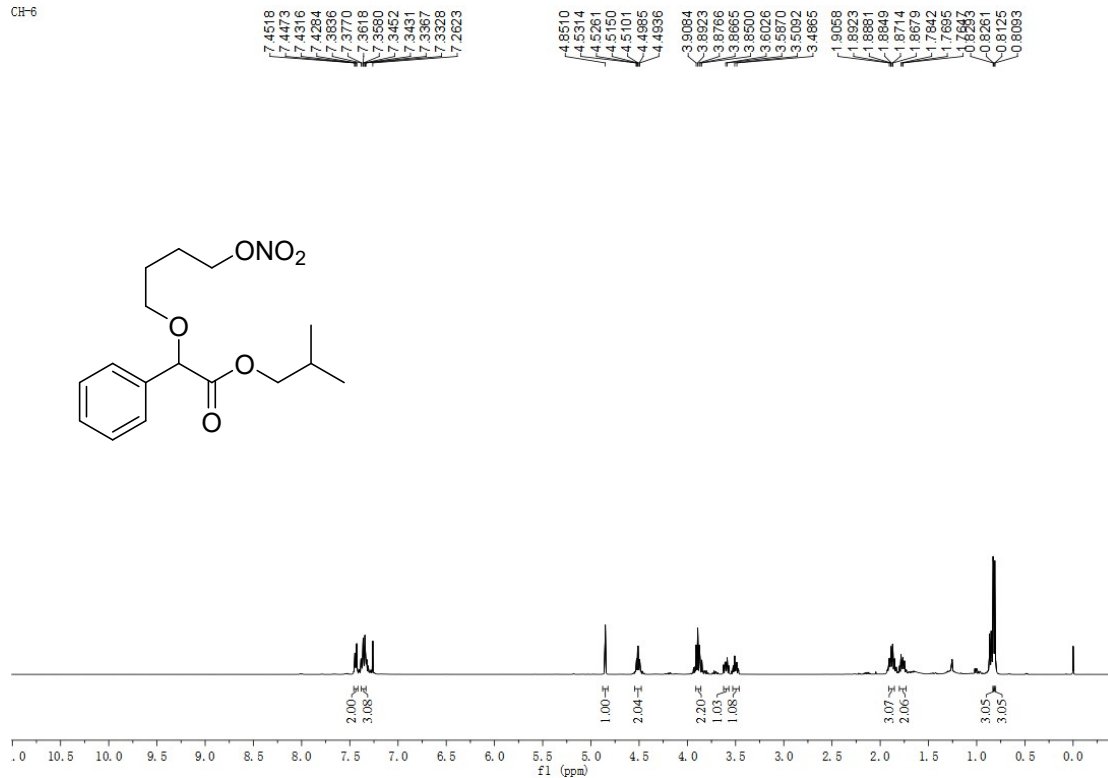

**4va**  $^{13}\text{C}$  NMR (101 MHz,  $\text{CDCl}_3$ )

CH-6

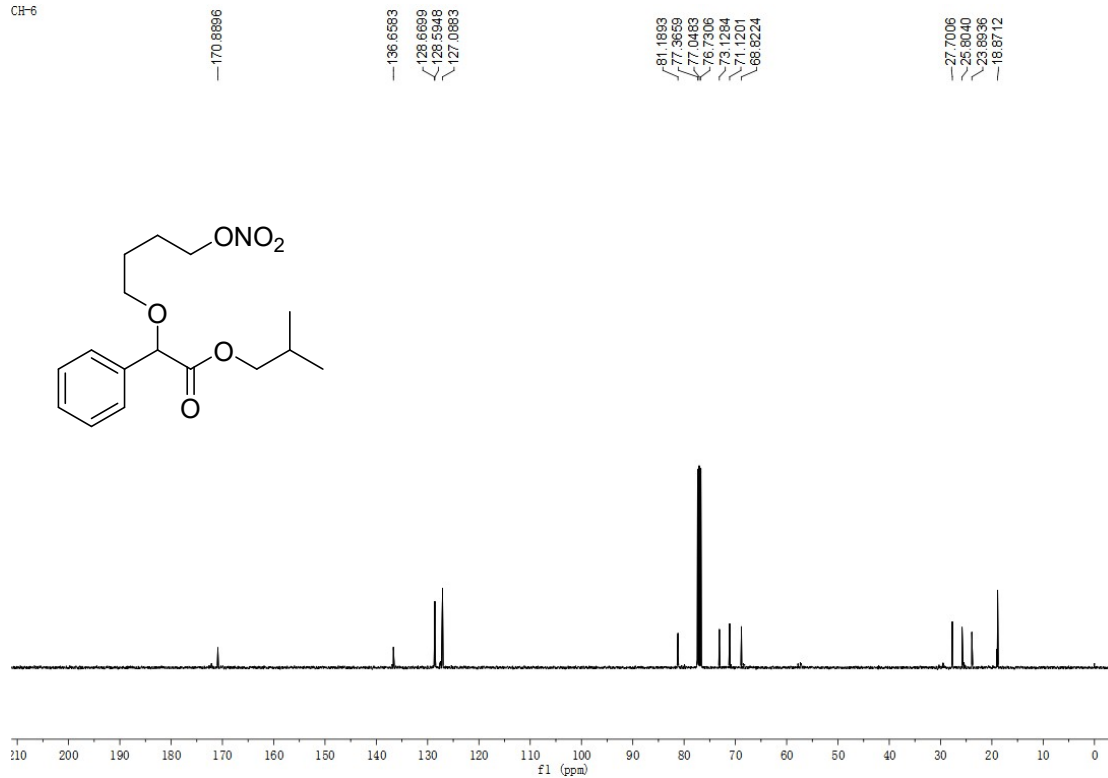

**4wa**  $^1\text{H}$  NMR (400 MHz,  $\text{CDCl}_3$ )

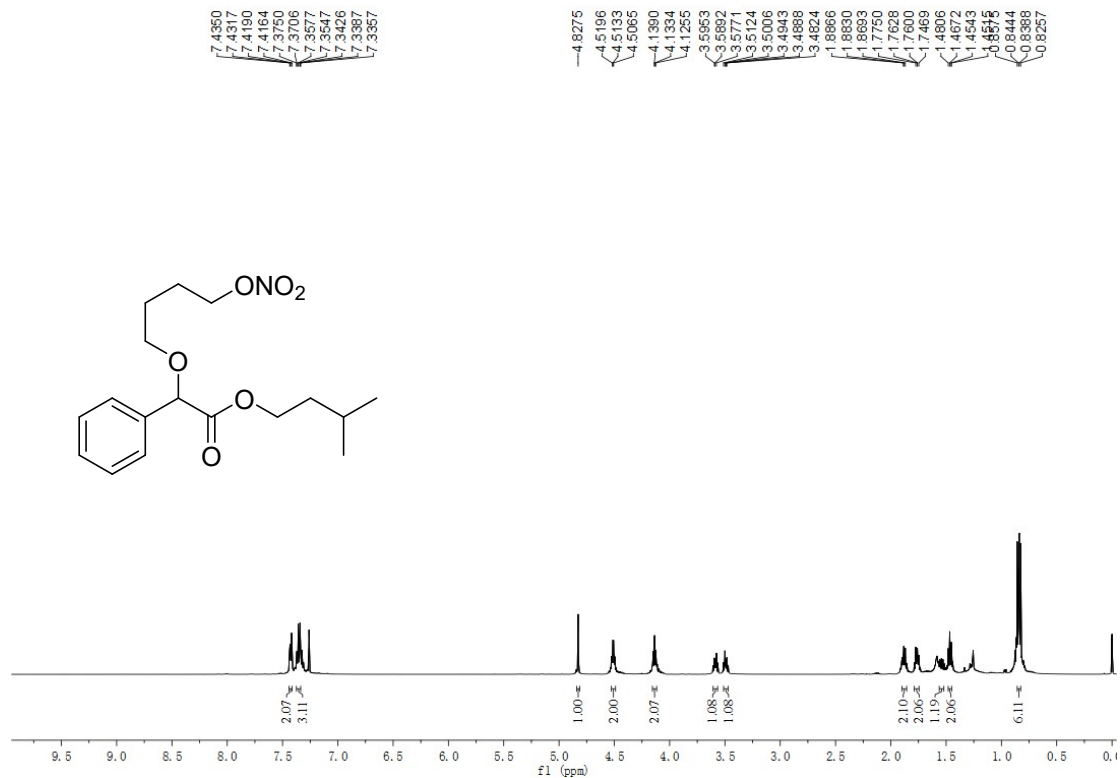

**4wa**  $^{13}\text{C}$  NMR (101 MHz,  $\text{CDCl}_3$ )

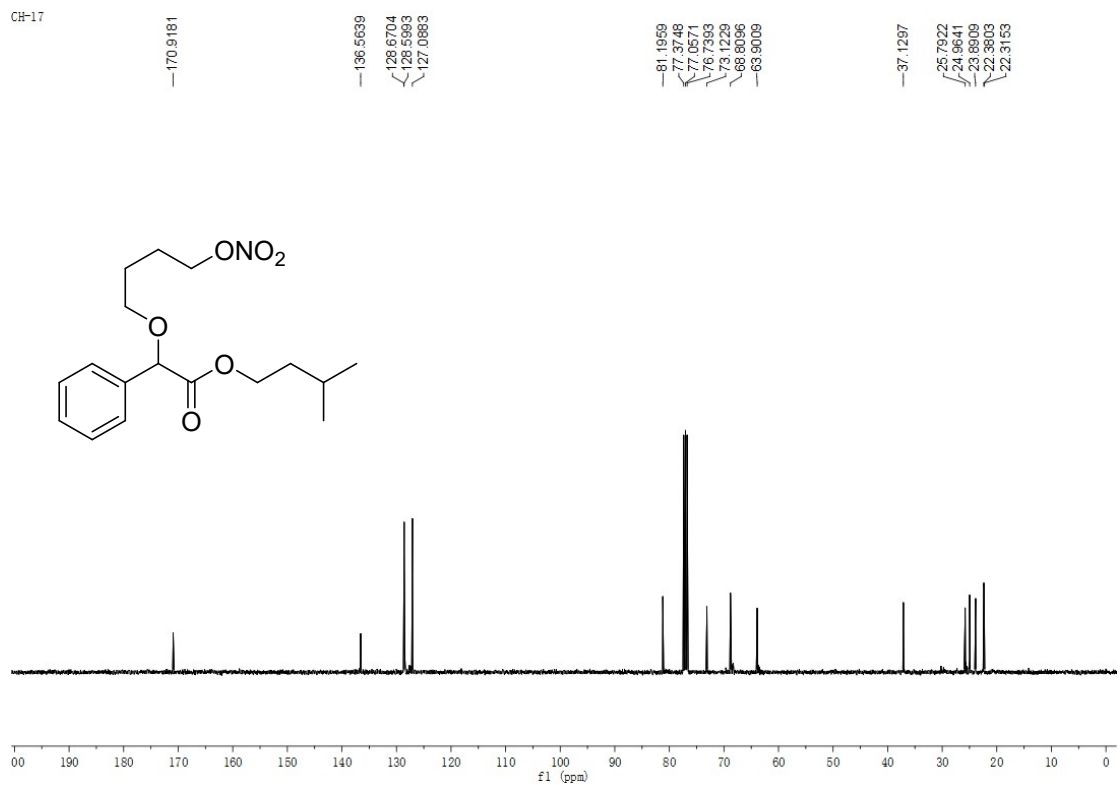

**4xa**  $^1\text{H}$  NMR (400 MHz,  $\text{CDCl}_3$ )

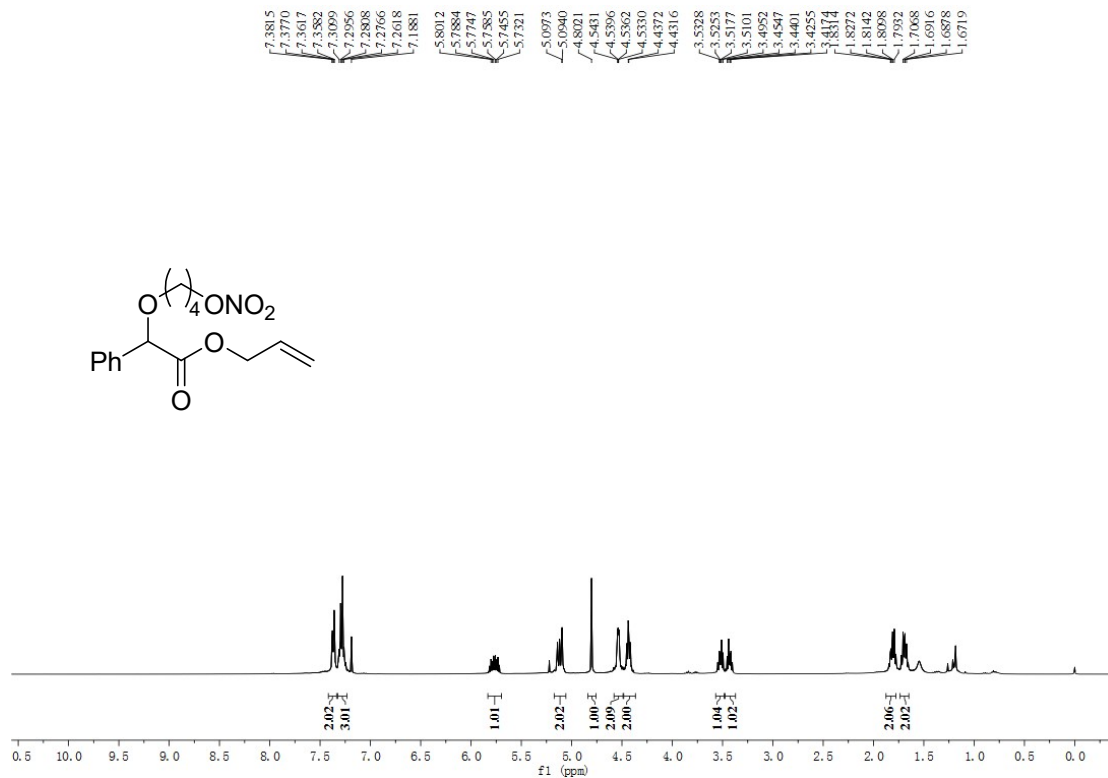

**4xa**  $^{13}\text{C}$  NMR (101 MHz,  $\text{CDCl}_3$ )

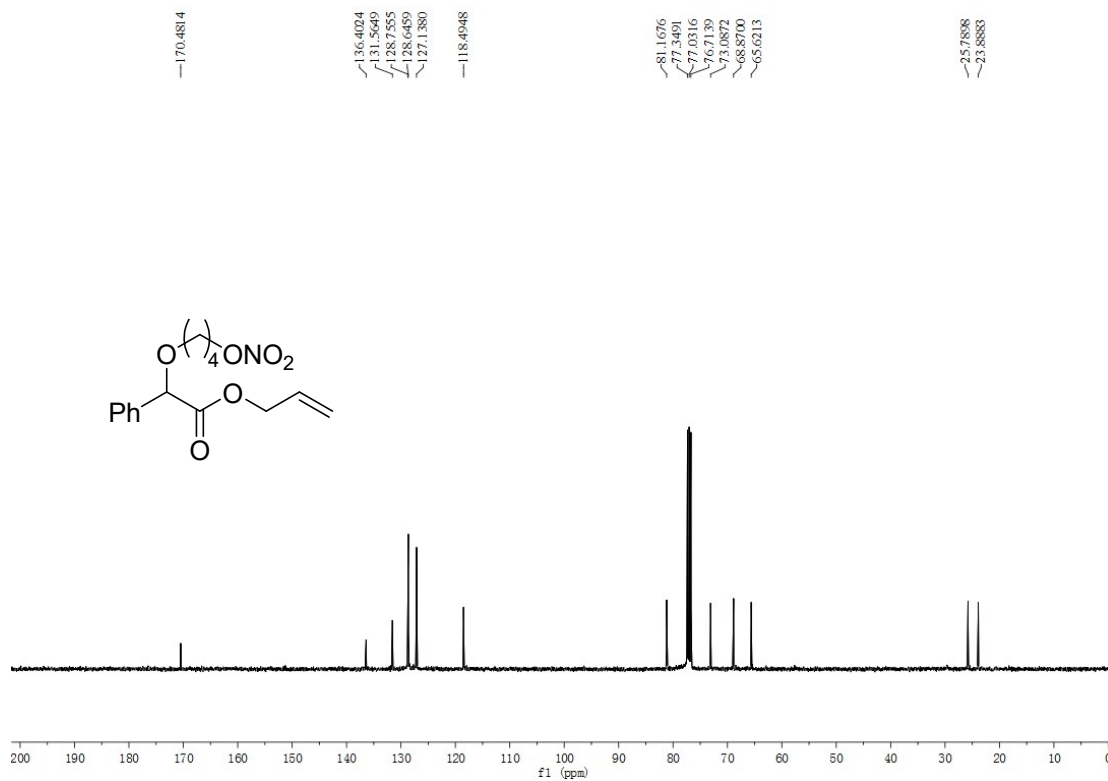

**4ya**  $^1\text{H}$  NMR (400 MHz,  $\text{CDCl}_3$ )

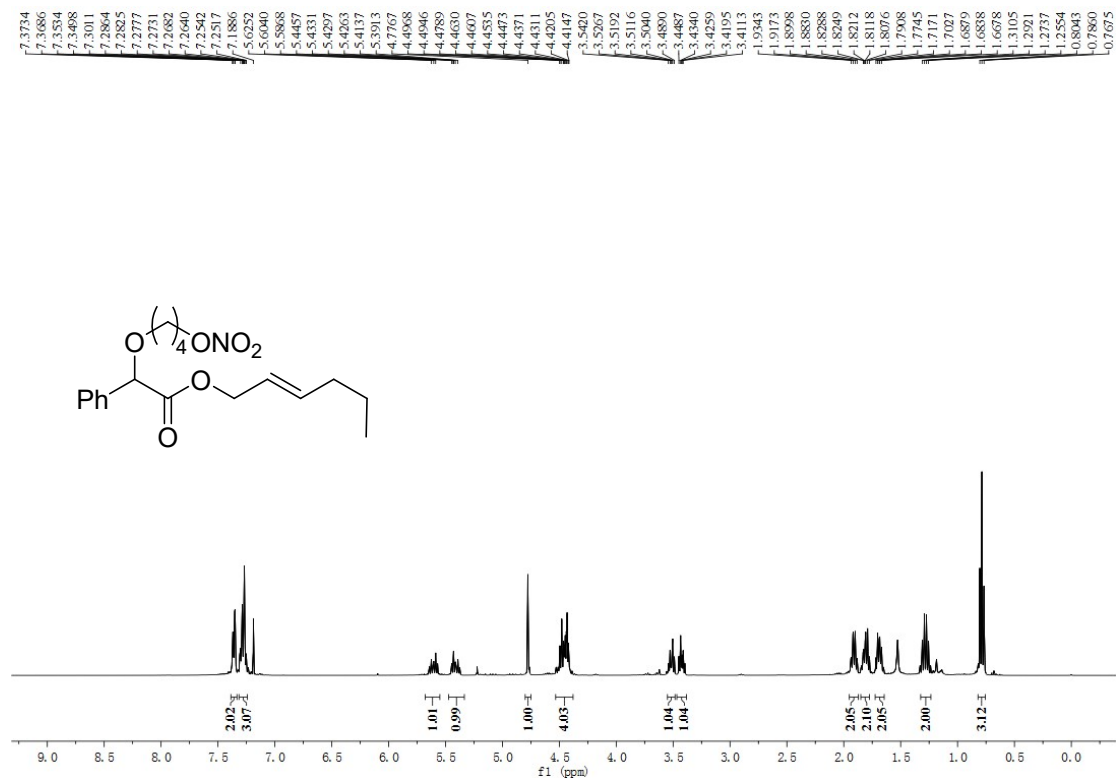

**4ya**  $^{13}\text{C}$  NMR (101 MHz,  $\text{CDCl}_3$ )

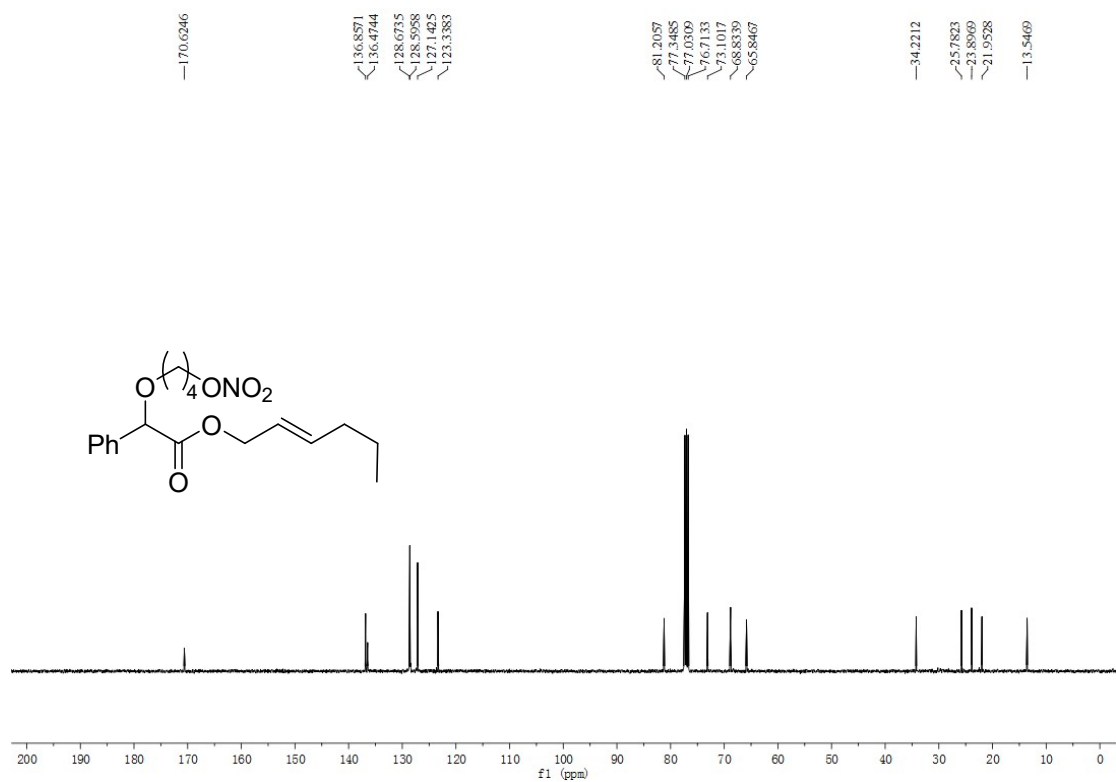

## CH-21

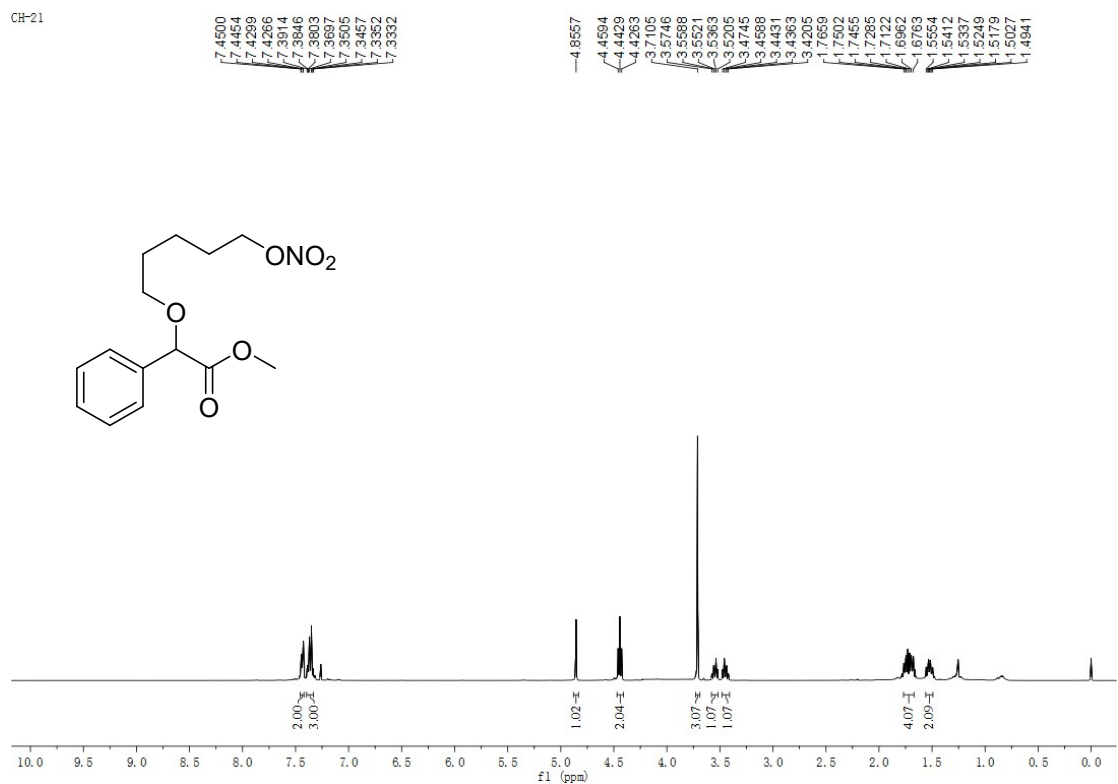

## CH-21

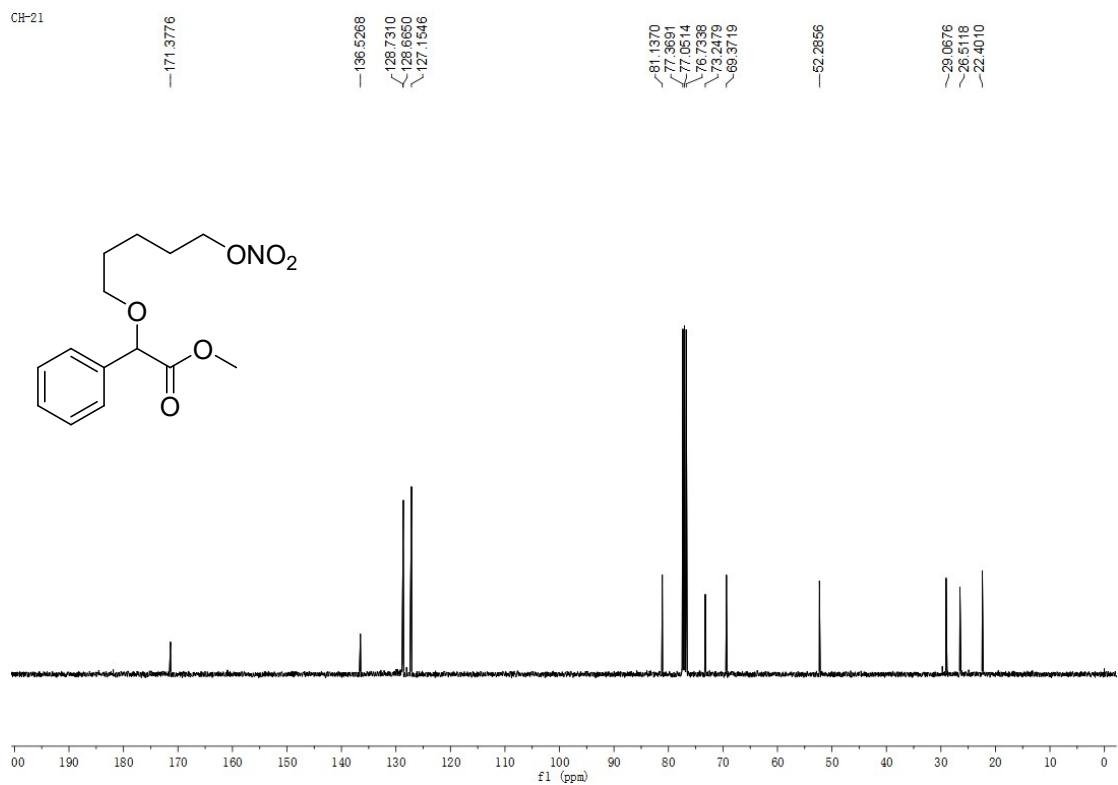

**4ac**  $^1\text{H}$  NMR (400 MHz,  $\text{CDCl}_3$ )

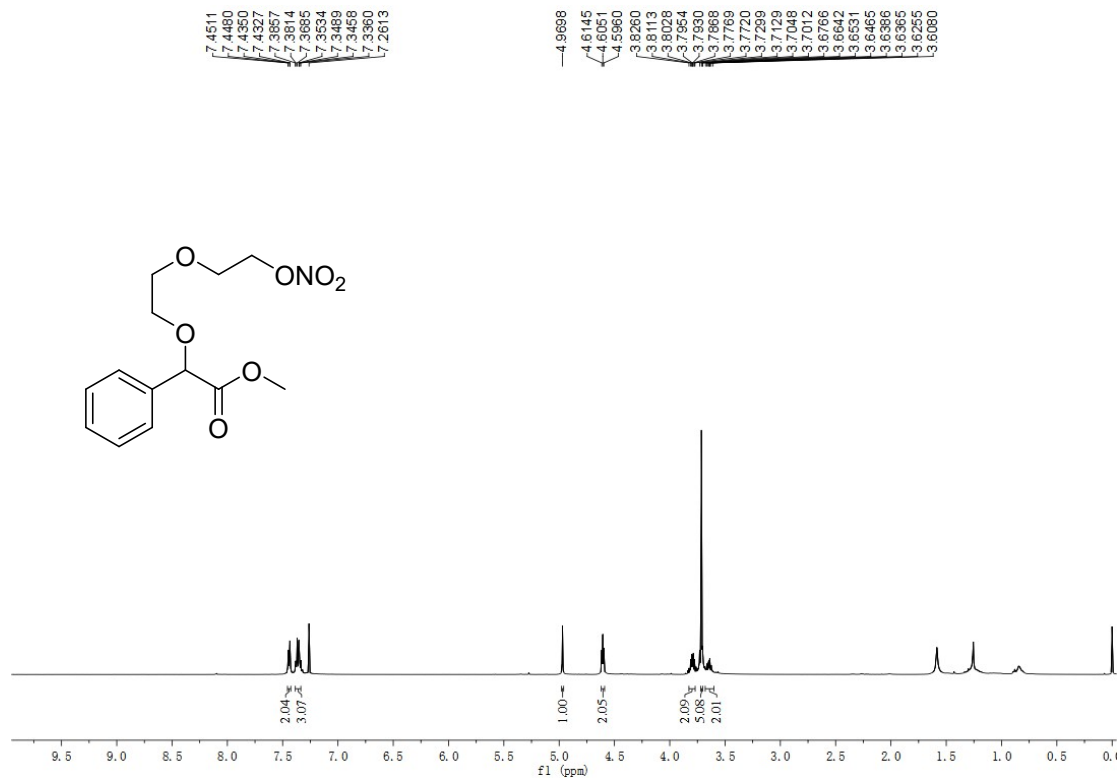

**4ac**  $^{13}\text{C}$  NMR (101 MHz,  $\text{CDCl}_3$ )

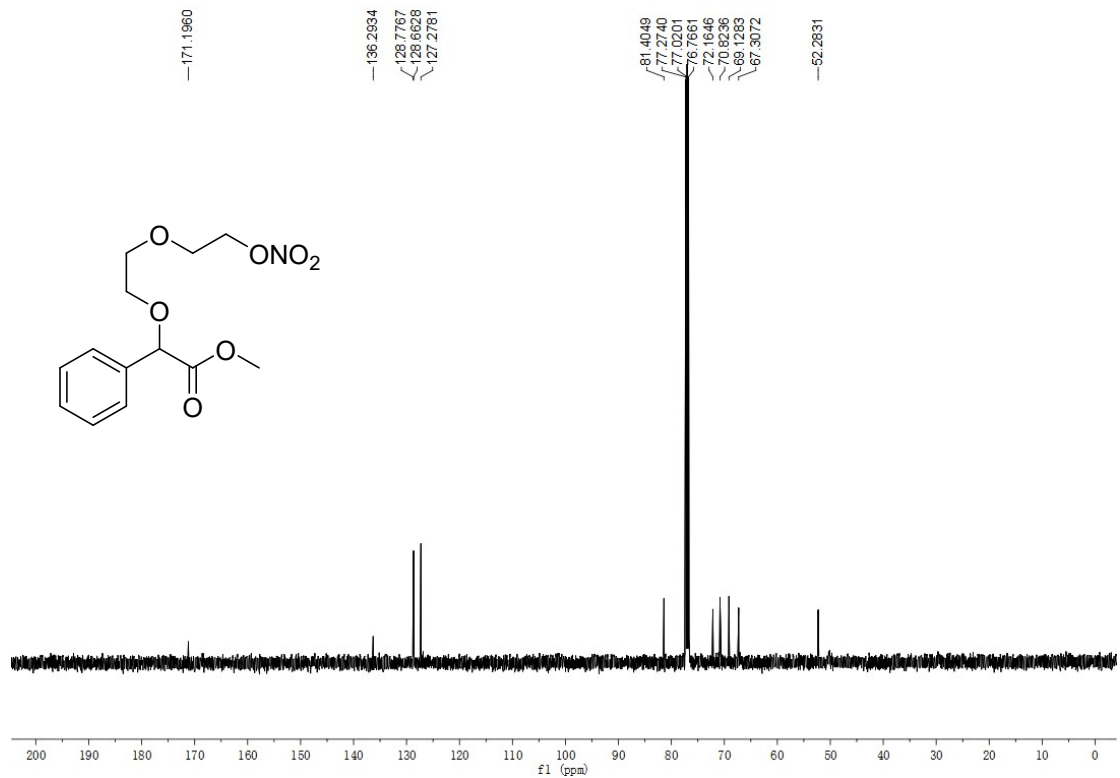

A  $^1\text{H}$  NMR (400 MHz,  $\text{CDCl}_3$ )

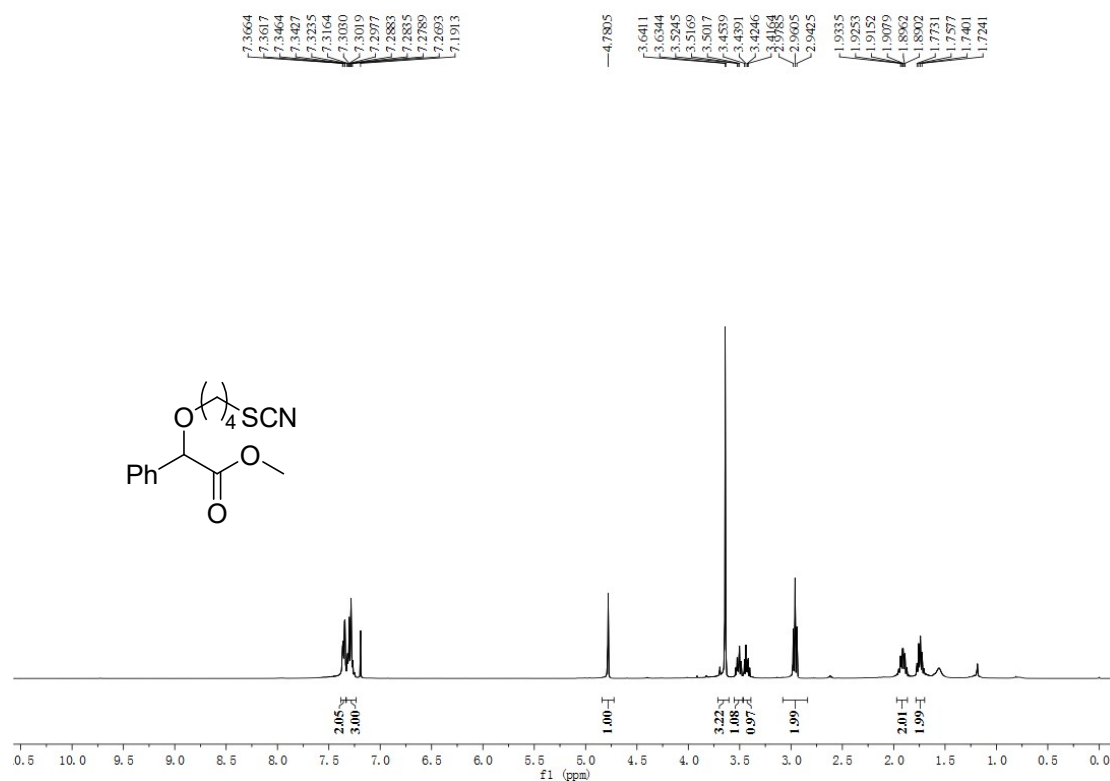

A  $^{13}\text{C}$  NMR (101 MHz,  $\text{CDCl}_3$ )

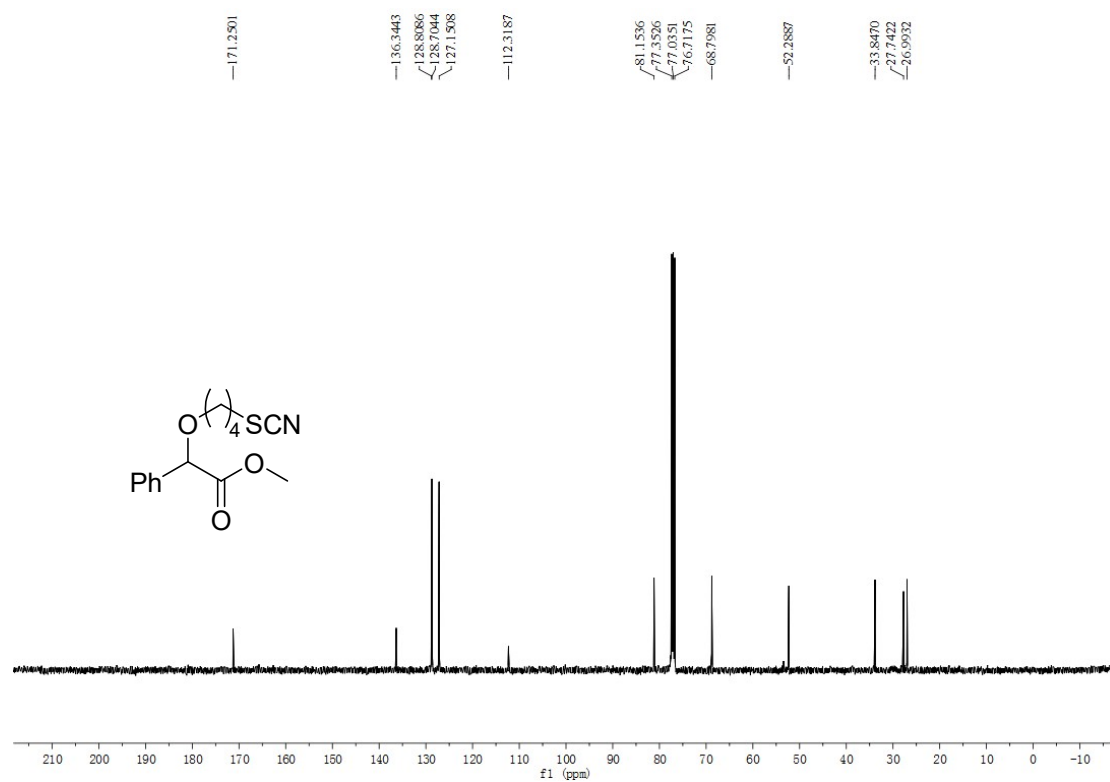

**B**  $^1\text{H}$  NMR (400 MHz,  $\text{CDCl}_3$ )

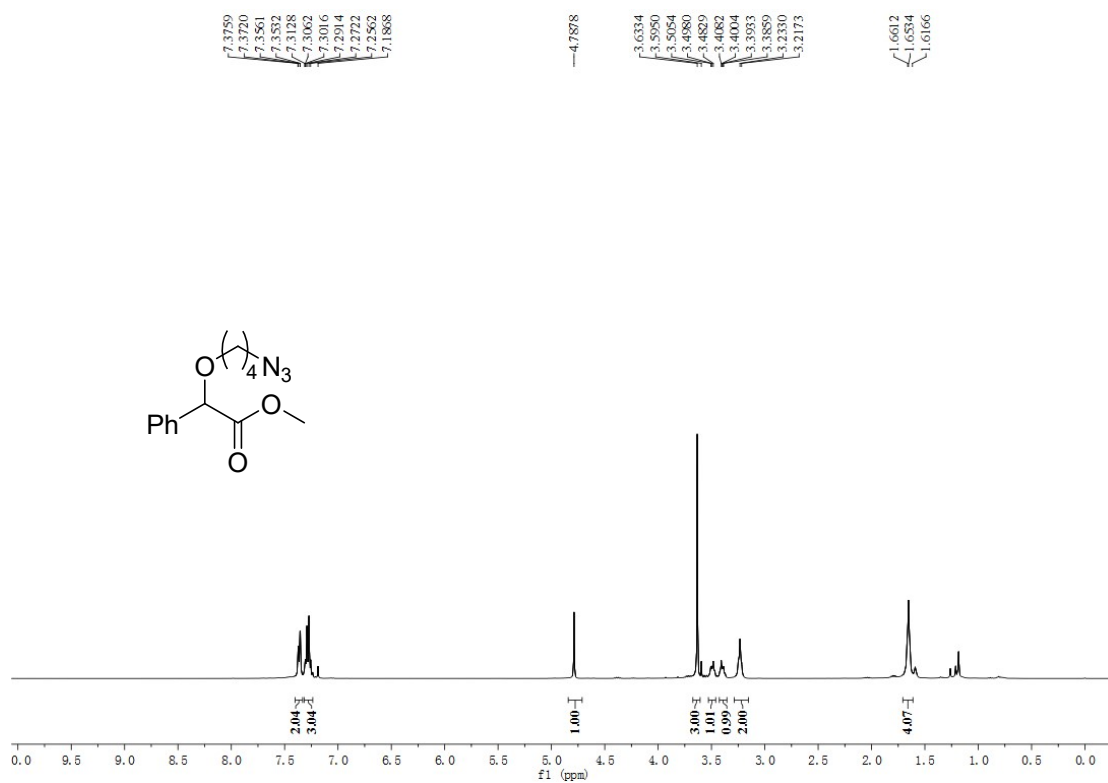

**B**  $^{13}\text{C}$  NMR (101 MHz,  $\text{CDCl}_3$ )

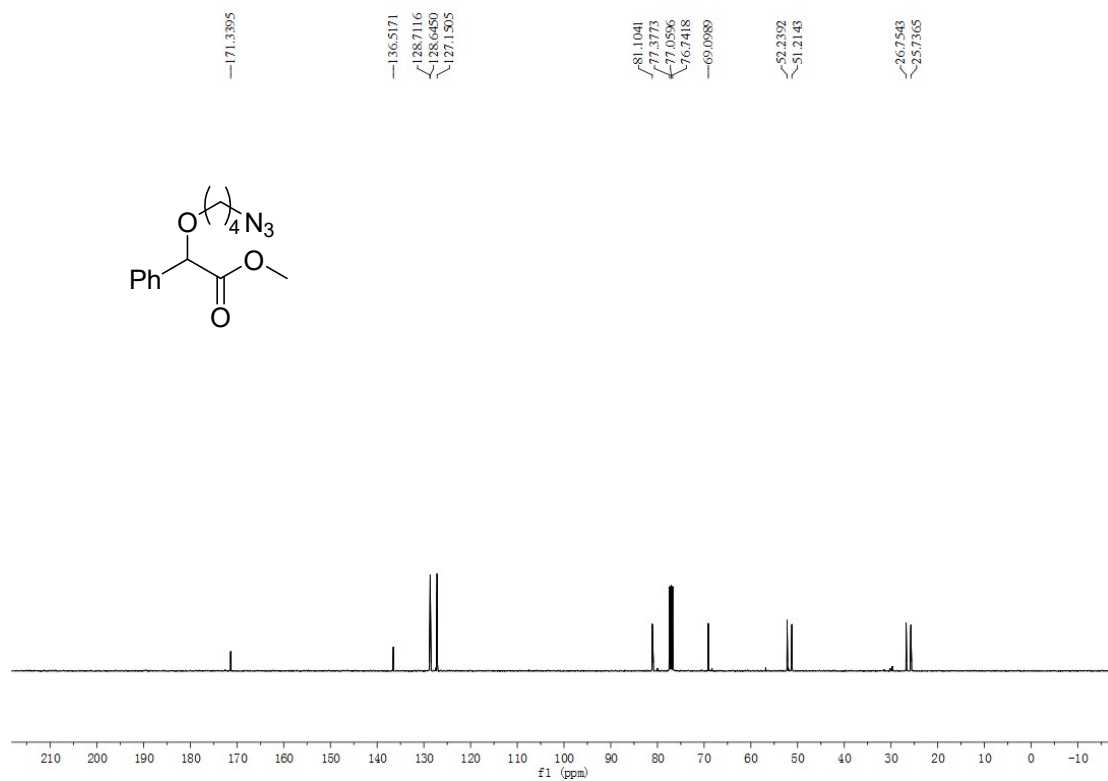

$^1\text{H}$  NMR (400 MHz,  $\text{CDCl}_3$ )

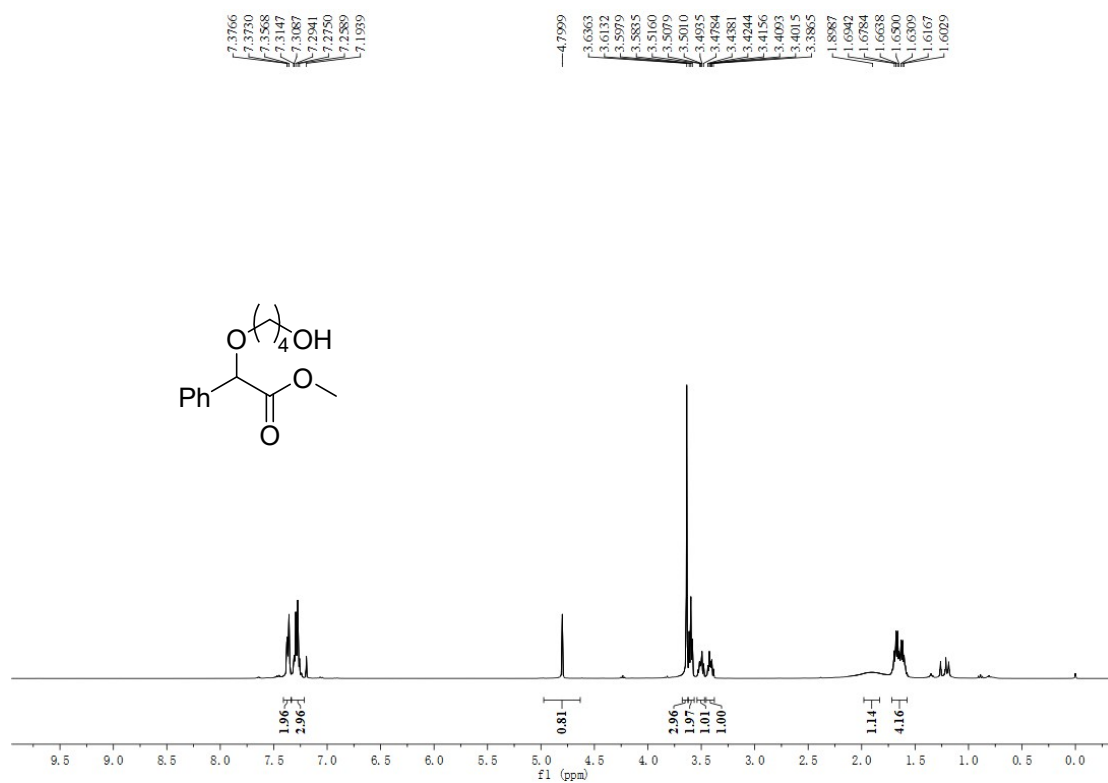

$^{13}\text{C}$  NMR (101 MHz,  $\text{CDCl}_3$ )

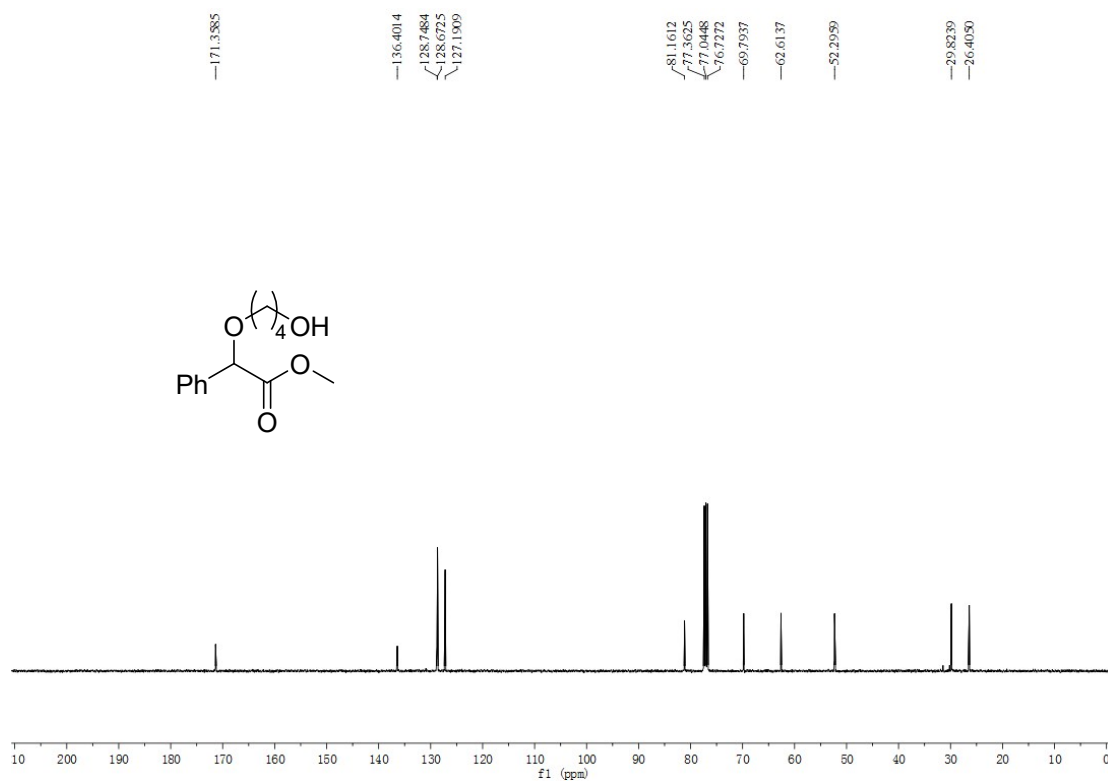

Supplement: d4cc03272a1.pdf [file d4cc03272a1.pdf]
